# Supplementary material for: Can the UNAIDS 90-90-90 target be achieved? A systematic analysis of national HIV treatment cascades
Source: PubMed Central journal article supplement — BMJ Glob Health. 2016 Sep 15;1(2):e000010. doi: 10.1136/bmjgh-2015-000010 (PMC5321333; doi:10.1136/bmjgh-2015-000010), 2016-09-15
Supplement: bmjgh-2015-000010supp_table1.pdf [file bmjgh-2015-000010supp_table1.pdf]

**Table 1 - Cascade data for 32 Full cascades and 37 Partial cascades**

| <b>Country<br/><br/>(year)</b>                    | <b>% of all<br/>PLHIV<br/>diagnosed</b> | <b>% of those<br/>Diagnosed<br/>receiving<br/>ART</b> | <b>% of<br/>those on<br/>ART<br/>achieving<br/>viral<br/>suppression</b> | <b>Final % of<br/>all PLHIV<br/>receiving<br/>ART</b> | <b>Final % of<br/>PLHIV<br/>achieving<br/>viral<br/>suppression</b> | <b>Viral<br/>suppression<br/>cut-of used</b> | <b>Total<br/>epidemic<br/>size</b> | <b>UNAIDS<br/>total<br/>estimated<br/>epidemic<br/>size at year<br/>of cascade</b> | <b>Source<br/><br/>(Cross sectional<br/>or<br/>Longitudinal)</b> |
|---------------------------------------------------|-----------------------------------------|-------------------------------------------------------|--------------------------------------------------------------------------|-------------------------------------------------------|---------------------------------------------------------------------|----------------------------------------------|------------------------------------|------------------------------------------------------------------------------------|------------------------------------------------------------------|
| <b>UNAIDS<br/>Targets<sup>1,11</sup></b>          | 90%                                     | 90%                                                   | 90%                                                                      | 81%                                                   | 73%                                                                 | <1,000                                       | -                                  | -                                                                                  | UNAIDS                                                           |
| <b>Global<sup>1,11</sup> (2014)</b>               | <b>54%</b>                              | 75%                                                   | 67%                                                                      | 40%                                                   | 27%                                                                 | <1,000                                       | 36.9 million                       | 36.9 million                                                                       | UNAIDS                                                           |
| <b>32 Full Cascades</b>                           |                                         |                                                       |                                                                          |                                                       |                                                                     |                                              |                                    |                                                                                    |                                                                  |
| <b>Switzerland<sup>1</sup><br/><br/>(2012)</b>    | 81%                                     | <b>88%</b>                                            | 96%                                                                      | 71%                                                   | 68%                                                                 | <200                                         | 15,200                             | 19,000                                                                             | Combined                                                         |
| <b>United Kingdom<sup>2</sup><br/><br/>(2013)</b> | <b>76%</b>                              | 90%                                                   | 90%                                                                      | 68%                                                   | 61%                                                                 | <200                                         | 107,800                            | 130,000                                                                            | Cross Sectional                                                  |
| <b>Rwanda<sup>3</sup><br/><br/>(2014)</b>         | 86%                                     | <b>79%</b>                                            | 86%                                                                      | 68%                                                   | 58%                                                                 | <40                                          | 209,180                            | 210,000                                                                            | Cross Sectional                                                  |
| <b>Australia<sup>4</sup></b>                      | 86%                                     | <b>76%</b>                                            | 93%                                                                      | 66%                                                   | 62%                                                                 | <400                                         | 26,764                             | 28,000                                                                             | Cross Sectional                                                  |

|                                                 |            |            |            |     |     |       |           |           |                 |
|-------------------------------------------------|------------|------------|------------|-----|-----|-------|-----------|-----------|-----------------|
| <b>(2013)</b><br><b>Netherlands<sup>5</sup></b> | 87%        | <b>73%</b> | 91%        | 64% | 58% | <200  | 25,000    | 21,250    | Cross Sectional |
| <b>(2013)</b><br><b>Thailand<sup>6</sup></b>    | 80%        | 76%        | <b>71%</b> | 61% | 43% | <50   | 445,503   | 450,000   | Cross Sectional |
| <b>(2014)</b><br><b>France<sup>7</sup></b>      | 81%        | <b>74%</b> | 86%        | 60% | 52% | <50   | 149,000   | NA        | Cross Sectional |
| <b>(2010)</b><br><b>Zimbabwe<sup>8,9</sup></b>  | <b>66%</b> | 77%        | 70%        | 51% | 36% | <500* | 1,328,535 | 1,550,250 | Combination     |
| <b>(2011-13)</b><br><b>Austria<sup>10</sup></b> | 80%        | <b>62%</b> | 91%        | 50% | 45% | NA    | 7,983     | 18,000    | Cross Sectional |
| <b>(2014)</b><br><b>Brazil<sup>11</sup></b>     | 80%        | <b>60%</b> | 72%        | 48% | 35% | <50   | 734,000   | 730,000   | Cross Sectional |
| <b>(2013)</b><br><b>Argentina<sup>8</sup></b>   | 71%        | <b>66%</b> | <b>66%</b> | 47% | 31% | <50   | 110,000   | 117,907   | Cross Sectional |
| <b>(2012)</b><br><b>Cuba<sup>12</sup></b>       | 75%        | <b>55%</b> | 73%        | 41% | 30% | NA    | 19,626    | 13,364    | Cross Sectional |
| <b>(2012)</b><br><b>Mexico<sup>13</sup></b>     | 67%        | <b>60%</b> | 62%        | 40% | 25% | NA    | 204,000   | 194,501   | Cross Sectional |

|                               |            |            |            |     |     |        |           |                        |                        |
|-------------------------------|------------|------------|------------|-----|-----|--------|-----------|------------------------|------------------------|
| <b>(2012)</b>                 |            |            |            |     |     |        |           |                        |                        |
| <b>Venezuela<sup>13</sup></b> | 54%        | 70%        | <b>31%</b> | 38% | 12% | NA     | 110,000   | 110,000                | Cross Sectional        |
| <b>(2012)</b>                 |            |            |            |     |     |        |           |                        |                        |
| <b>USA<sup>14</sup></b>       | 86%        | <b>43%</b> | 81%        | 37% | 30% | <200   | 1,200,000 | 920,000 -<br>1,800,000 | Cross Sectional        |
| <b>(2012)</b>                 |            |            |            |     |     |        |           |                        |                        |
| <b>Peru<sup>13</sup></b>      | 53%        | 67%        | <b>51%</b> | 36% | 18% | NA     | 76,000    | 65,000                 | Cross Sectional        |
| <b>(2012)</b>                 |            |            |            |     |     |        |           |                        |                        |
| <b>Mauritius<sup>15</sup></b> | 66%        | <b>53%</b> | 62%        | 35% | 22% | <1,000 | 9,200     | 8,300                  | Cross Sectional        |
| <b>(2014)</b>                 |            |            |            |     |     |        |           |                        |                        |
| <b>Kenya<sup>16</sup></b>     | <b>51%</b> | 67%        | 79%        | 34% | 27% | <1,000 | 1,356,540 | 1,366,920              | Longitudinal<br>Survey |
| <b>(2012)</b>                 |            |            |            |     |     |        |           |                        |                        |
| <b>(15+ years)</b>            |            |            |            |     |     |        |           |                        |                        |
| <b>Georgia<sup>17</sup></b>   | <b>56%</b> | 60%        | 82%        | 34% | 28% | <400   | 6,600     | 6,600                  | Cross Sectional        |
| <b>(2014)</b>                 |            |            |            |     |     |        |           |                        |                        |
| <b>Vietnam<sup>18</sup></b>   | 85%        | <b>37%</b> | 78%        | 31% | 24% | NA     | 254,950   | 250,000                | Cross Sectional        |
| <b>(2013)</b>                 |            |            |            |     |     |        |           |                        |                        |
| <b>Estonia<sup>19</sup></b>   | 87%        | <b>33%</b> | 66%        | 29% | 19% | <200   | 9,279     | 8,600                  | Cross Sectional        |
| <b>(2013)</b>                 |            |            |            |     |     |        |           |                        |                        |
| <b>Paraguay<sup>8</sup></b>   | 74%        | <b>38%</b> | 70%        | 28% | 18% | NA     | 16,825    | 17,000                 | Cross Sectional        |



|                                          |                                         |                                                       |                                                                          |                                                       |                                                                     |                                              |                                                 |                                                             |                                                                  |
|------------------------------------------|-----------------------------------------|-------------------------------------------------------|--------------------------------------------------------------------------|-------------------------------------------------------|---------------------------------------------------------------------|----------------------------------------------|-------------------------------------------------|-------------------------------------------------------------|------------------------------------------------------------------|
| <b>Russia<sup>23</sup><br/>(2013)</b>    | 49%                                     | <b>23%</b>                                            | 81%                                                                      | 12%                                                   | 9%                                                                  | <1,000                                       | 1,363,330                                       | 850,000 -<br>1,300,000                                      | Cross Sectional                                                  |
| <b>Country<br/><br/>(year)</b>           | <b>% of all<br/>PLHIV<br/>diagnosed</b> | <b>% of those<br/>Diagnosed<br/>receiving<br/>ART</b> | <b>% of<br/>those on<br/>ART<br/>achieving<br/>viral<br/>suppression</b> | <b>Final % of<br/>all PLHIV<br/>receiving<br/>ART</b> | <b>Final % of<br/>PLHIV<br/>achieving<br/>viral<br/>suppression</b> | <b>Viral<br/>suppression<br/>cut-of used</b> | <b>Reported<br/>Total<br/>epidemic<br/>size</b> | <b>UNAIDS<br/>estimated<br/>total<br/>epidemic<br/>Size</b> | <b>Source<br/><br/>(Cross sectional<br/>or<br/>Longitudinal)</b> |
| <b>37 Partial Cascades</b>               |                                         |                                                       |                                                                          |                                                       |                                                                     |                                              |                                                 |                                                             |                                                                  |
| <b>Botswana<sup>8,9</sup><br/>(2014)</b> | NA                                      | NA                                                    | 79%                                                                      | 63%                                                   | 50%                                                                 | <400*                                        | 392,321                                         | 392,427                                                     | Combination                                                      |
| <b>Zambia<sup>8,9</sup><br/>(2014)</b>   | NA                                      | NA                                                    | 73%                                                                      | 56%                                                   | 41%                                                                 | <400*                                        | 1,200,000                                       | 1,150,370                                                   | Combination                                                      |
| <b>Uganda<sup>8,9</sup><br/>(2014)</b>   | NA                                      | NA                                                    | 67%                                                                      | 51%                                                   | 34%                                                                 | <1,000                                       | 1,500,000                                       | 1,486,640                                                   | Combination                                                      |
| <b>Malawi<sup>8</sup><br/>(2014)</b>     | NA                                      | NA                                                    | 84%                                                                      | 49%                                                   | 42%                                                                 | NA                                           | 1,100,000                                       | 1,063,910                                                   | Combination                                                      |
| <b>Guyana<sup>8</sup></b>                | 86%                                     | <b>57%</b>                                            | NA                                                                       | 49%                                                   | NA                                                                  | NA                                           | 7,200                                           | 7,500                                                       | Cross Sectional                                                  |



|                                                     |            |            |     |     |     |       |           |           |                 |
|-----------------------------------------------------|------------|------------|-----|-----|-----|-------|-----------|-----------|-----------------|
| <b>Panama<sup>8</sup></b><br><b>(2012)</b>          | 70%        | <b>48%</b> | NA  | 33% | NA  | NA    | 17,000    | 15,000    | Cross Sectional |
| <b>Morocco<sup>8</sup></b><br><b>(2014)</b>         | <b>35%</b> | 75%        | NA  | N6% | NA  | NA    | 28,829    | 28,740    | Cross Sectional |
| <b>Cote d'Ivoire<sup>8,9</sup></b><br><b>(2012)</b> | NA         | NA         | 55% | 24% | 13% | <300* | 450,000   | 462,301   | Combination     |
| <b>Egypt 15+<sup>8</sup></b><br><b>(2014)</b>       | 64%        | <b>37%</b> | NA  | 24% | NA  | NA    | 7,200     | 8,810     | Cross Sectional |
| <b>Guatemala<sup>13</sup></b><br><b>(2012)</b>      | <b>39%</b> | 63%        | NA  | 24% | NA  | NA    | 58,000    | NA        | Cross Sectional |
| <b>Fiji<sup>8</sup></b><br><b>(2013)</b>            | 65%        | <b>32%</b> | NA  | 21% | NA  | NA    | 1,000     | 660       | Cross Sectional |
| <b>Philippines<sup>8</sup></b><br><b>(2013)</b>     | 59%        | <b>34%</b> | NA  | 20% | NA  | NA    | 28,072    | 34,000    | Cross Sectional |
| <b>Nigeria<sup>8,9</sup></b><br><b>(2013)</b>       | NA         | NA         | 72% | 20% | 14% | <400* | 3,229,757 | 3,400,000 | Combination     |
| <b>Cameroon<sup>8,9</sup></b><br><b>(2013)</b>      | NA         | NA         | 65% | 20% | 14% | <500* | 600,000   | 600,000   | Combination     |

|                                                 |            |            |    |     |    |    |         |         |                 |
|-------------------------------------------------|------------|------------|----|-----|----|----|---------|---------|-----------------|
| <b>Kyrgyzstan<sup>24</sup></b><br><b>(2014)</b> | 70%        | <b>27%</b> | NA | 19% | NA | NA | 8,021   | 9,259   | Cross Sectional |
| <b>Moldova<sup>8</sup></b><br><b>(2014)</b>     | <b>39%</b> | 46%        | NA | 18% | NA | NA | 17,541  | NA      | Cross Sectional |
| <b>Montenegro<sup>8</sup></b><br><b>(2014)</b>  | <b>29%</b> | 61%        | NA | 18% | NA | NA | 463     | <1,000  | Cross Sectional |
| <b>Ecuador<sup>13</sup></b><br><b>(2012)</b>    | <b>36%</b> | 49%        | NA | 17% | NA | NA | 52,000  | 32,678  | Cross Sectional |
| <b>Bhutan<sup>8</sup></b><br><b>(2014)</b>      | <b>40%</b> | 41%        | NA | 17% | NA | NA | 1,000   | NA      | Cross Sectional |
| <b>Bolivia<sup>13</sup></b><br><b>(2012)</b>    | 39%        | <b>37%</b> | NA | 14% | NA | NA | 16,000  | 16,749  | Cross Sectional |
| <b>Tunisia<sup>8</sup></b><br><b>(2013)</b>     | <b>33%</b> | 42%        | NA | 14% | NA | NA | 3,991   | 2,688   | Cross Sectional |
| <b>Indonesia<sup>66</sup></b><br><b>(2014)</b>  | 32%        | <b>23%</b> | NA | 7%  | NA | NA | 590,000 | 660,272 | Cross Sectional |
| <b>Iran<sup>8</sup></b><br><b>(2014)</b>        | 30%        | <b>24%</b> | NA | 7%  | NA | NA | 75,000  | 74,370  | Cross Sectional |



|                                                 |            |            |            |    |    |      |        |       |                 |
|-------------------------------------------------|------------|------------|------------|----|----|------|--------|-------|-----------------|
| <b>Yemen<sup>8</sup></b><br><b>(2013)</b>       | <b>11%</b> | 24%        | NA         | 3% | NA | NA   | 35,000 | 7,200 | Cross Sectional |
| <b>Afghanistan<sup>8</sup></b><br><b>(2012)</b> | 31%        | <b>11%</b> | NA         | 3% | NA | NA   | 4,948  | 5,627 | Cross Sectional |
| <b>Belgium<sup>25</sup></b><br><b>(2010)</b>    | NA         | <b>72%</b> | 95%        | NA | NA | <500 | NA     | NA    | Longitudinal    |
| <b>Denmark<sup>26</sup></b><br><b>(2010)</b>    | NA         | <b>73%</b> | 96%        | NA | NA | <500 | NA     | 5,000 | Longitudinal    |
| <b>Dominica<sup>8</sup></b><br><b>(2014)</b>    | NA         | 68%        | <b>54%</b> | NA | NA | NA   | NA     | NA    | Cross Sectional |

The numbers in **bold** identify the main 'breakpoint' – the greatest point of attrition in each countries cascade.

\* Countries viral suppression percentage was estimated using a systematic review on viral suppression rates for sub-Saharan African Countries.<sup>9</sup>

## References

50. Kohler P, Schmidt AJ, Cavassini M, et al. Swiss HIV Cohort Study. The HIV care cascade in Switzerland: reaching the UNAIDS/WHO targets for patients diagnosed with HIV. *AIDS* 2015;29: 2509–15.
51. Gisinger M, Kitchen M, Leierer G, et al. HIV/AIDS in Austria 26 the Report of the Austrian HIV Cohort Study. Report number: 26; 2014.
52. Alonso-González M. Antiretroviral treatment in the spotlight: a public health analysis in Latin America and the Caribbean. Washington: Pan American Health Organization (PAHO), 2012:52.
53. Piñeirúa A, Sierra-Madero J, Cahn P, et al. The HIV care continuum in Latin America: challenges and opportunities. *Lancet Infect Dis* 2015;15:833–9.
54. Amita Pathak. HIV treatment cascade as at December 2014 Republic of Mauritius. Mauritius July report International AIDS Society. 2015; Achieving 90-90-90 by 2020.
55. Kenya A. Indicator Survey 2012. Preliminary Report. Nairobi: National AIDS and STI Control Programme, Ministry of Health Kenya, 2013.
56. Chkhartishvili N, Sharavdze L, Chokoshvili O, et al. The cascade of care in the Eastern European country of Georgia. *HIV Med* 2015;16:62–6.
57. Kato M, Long NH, Duong BD, et al. Enhancing the Benefits of Antiretroviral Therapy in Vietnam: Towards Ending AIDS. *Curr HIV/ AIDS Rep* 2014;11:487–95.
58. Raben D, Jakobsen SF, Nakagawa F, et al. HIV/AIDS treatment and care in Estonia. Evaluation report. WHO Collaborating Centre for HIV and Viral Hepatitis; June 2014.
59. Kazatchkine M. Treatment cascade for Ukraine. Drug use, HIV, HCV and TB: major interlinked challenges in Eastern Europe and Central Asia. United Nations Switzerland Oral Presentation, HIV Drug Therapy, November 2014 Glasgow, Slide 12. Nov 3rd 2014(Special Envoy for HIV/AIDS in Eastern Europe and Central Asia, Geneva.
60. Raben DJK. HIV programme review in Belarus. CHIP and WHO. Evaluation Report (National health programme), 2014.
61. Lo YR, Kato M, Phanuphak N, et al. Challenges and potential barriers to the uptake of antiretroviral-based prevention in Asia and the Pacific region. *Sex Health* 2014;11:126–36.
62. Mansfeld M, Ristol M, Likatavicius G. HIV treatment cascade for Kyrgyzstan. HIV Programme Review in Kyrgyzstan Evaluation report. December 2012; WHO Collaborating Centre for HIV and Viral Hepatitis (Figure 1, page 11).
63. Van Beckhoven D, Lacor P, Moutschen M, et al. Factors associated with the continuum of care of HIV-infected patients in Belgium. *J Int AIDS Soc* 2014;17(Suppl 3):19534.
64. Helleberg M, Häggblom A, Sönnberg A, et al. HIV Care in the Swedish-Danish HIV Cohort 1995–2010. Closing the Gaps. e72257. *PLoS ONE* 2013;8:e72257.
65. Takuca S, Brown A, Macleod W, et al. Disparities in engagement within care in South Africa. Seattle, Washington February 23–36th, 2015, The Annual Conference on Retroviruses and Opportunistic Infections (CROI); Abstract 154.
66. Siti Natia Wiweko, et al. Introduction of the strategic use of ARVs for treatment and prevention in Indonesia: from policy to implementation. Data from MOH 2014. International AIDS Conference; Australia, 2014.
