# Supplementary figures and images for: Can the UNAIDS 90-90-90 target be achieved? A systematic analysis of national HIV treatment cascades
Source: PubMed Central journal article supplement — BMJ Glob Health. 2016 Sep 15;1(2):e000010. doi: 10.1136/bmjgh-2015-000010 (PMC5321333; doi:10.1136/bmjgh-2015-000010), 2016-09-15

# Appendix Figure 1 Flow Diagram of Search method

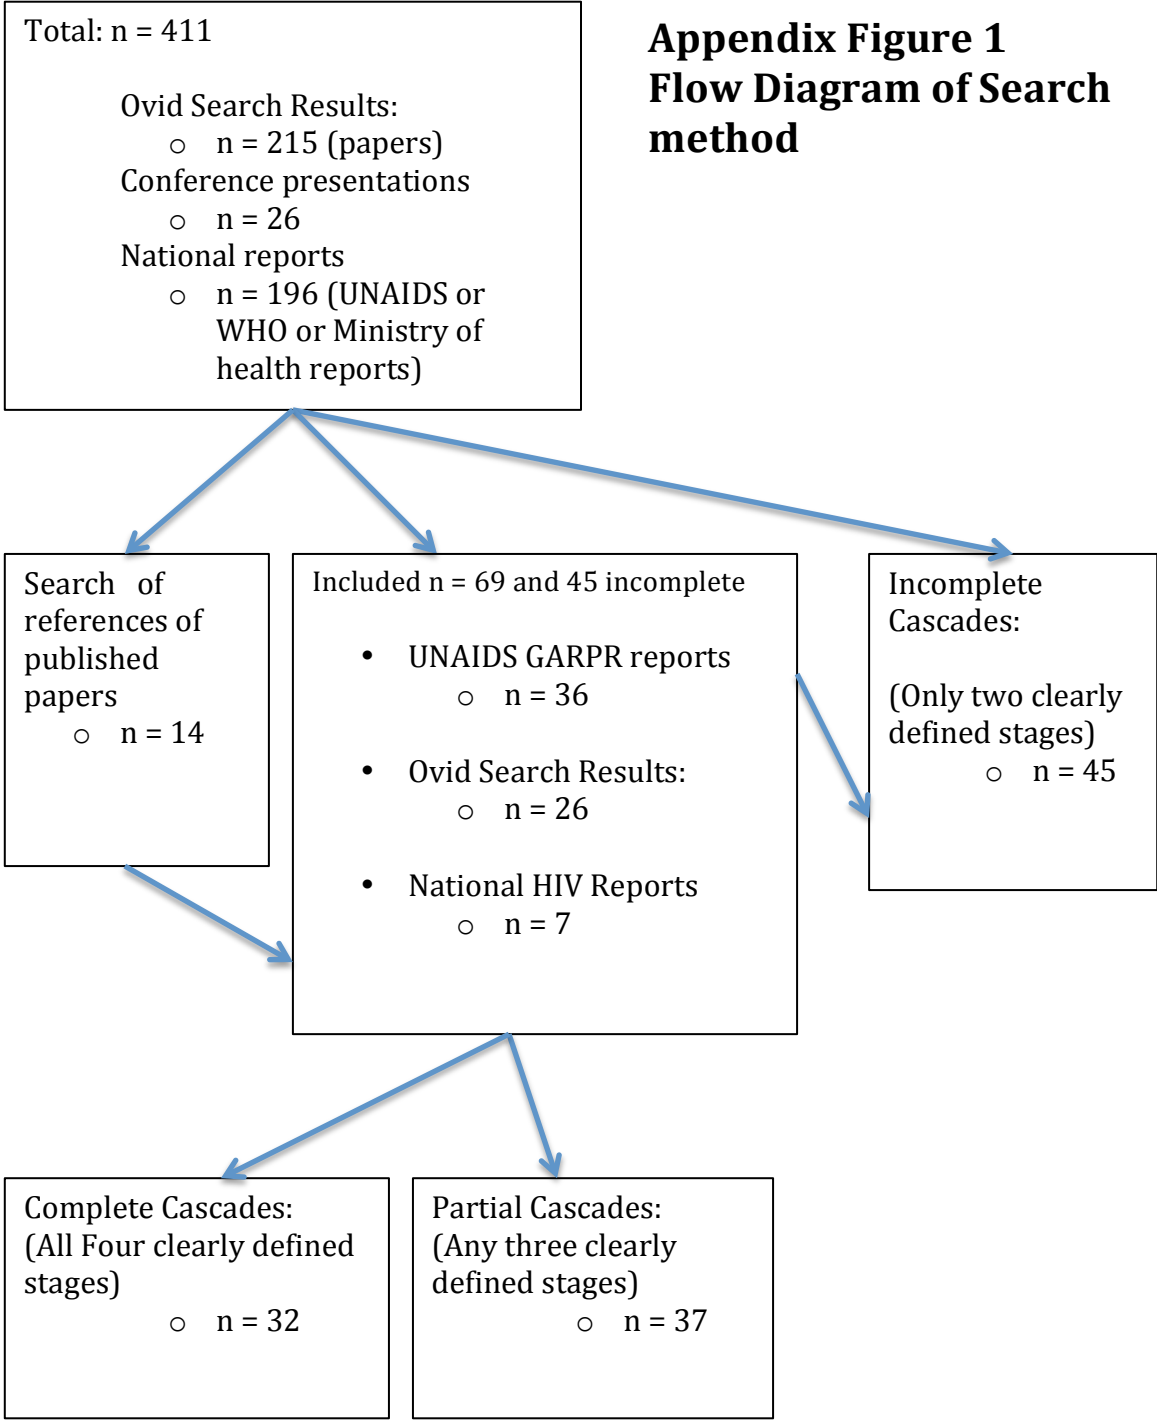

Supplement: bmjgh-2015-000010supp_figure1.pdf [file bmjgh-2015-000010supp_figure1.pdf]

Supplementary Figure 2

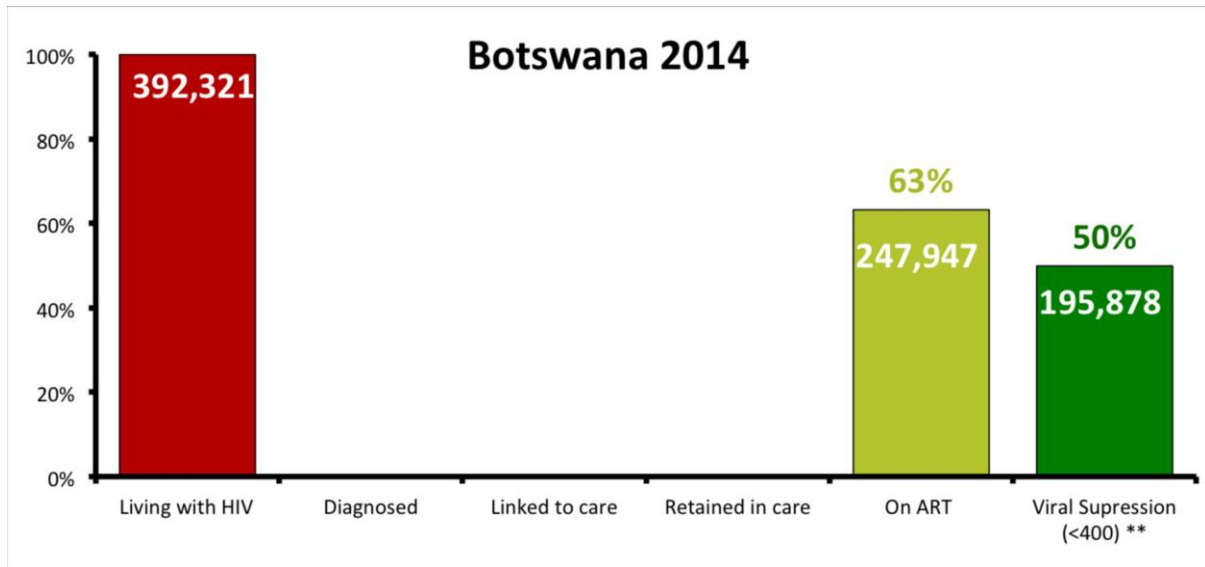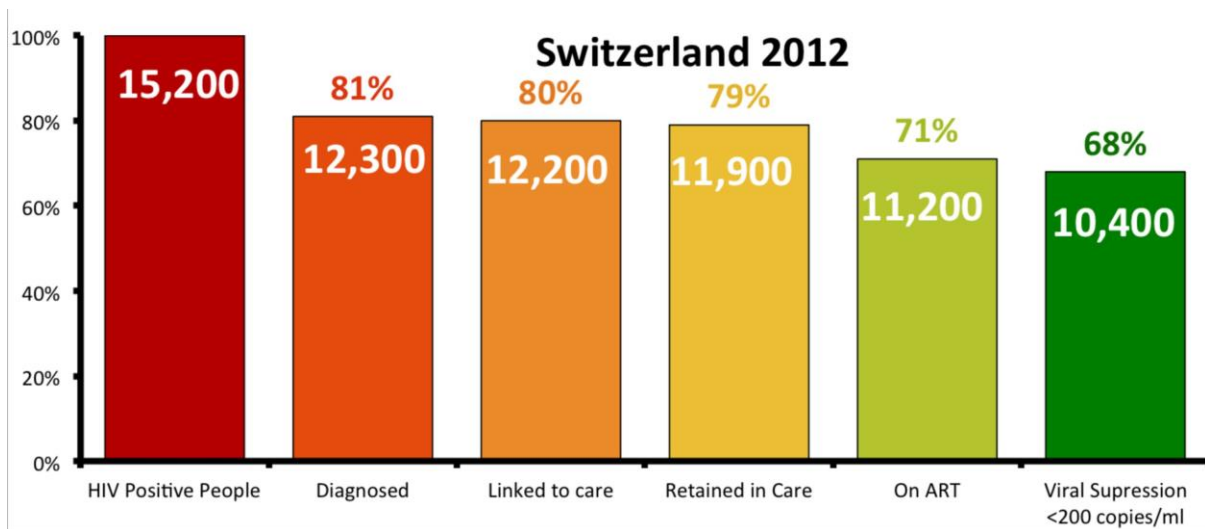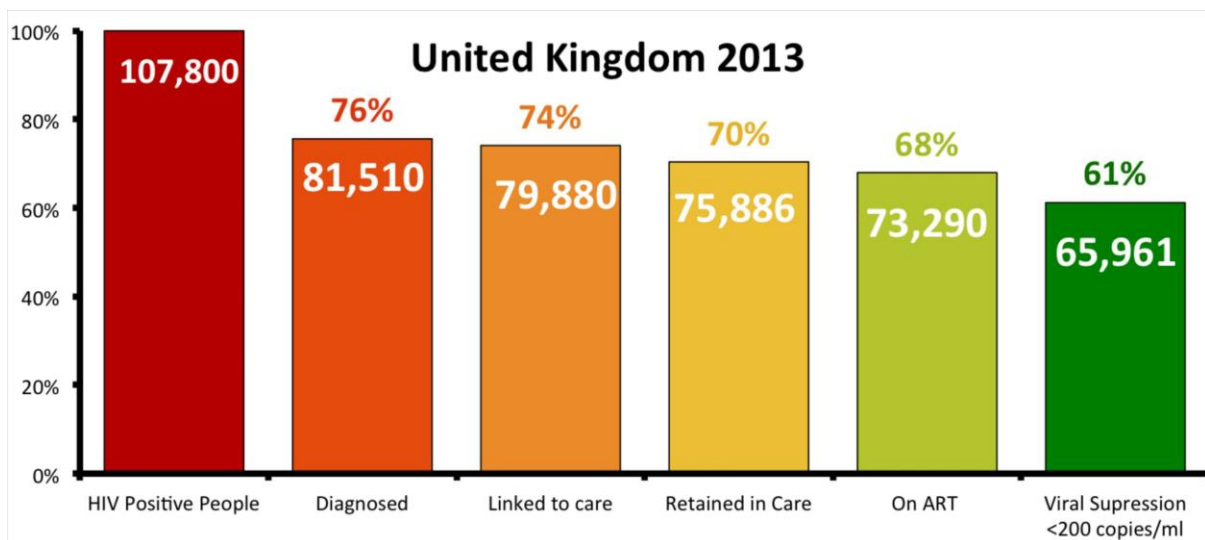

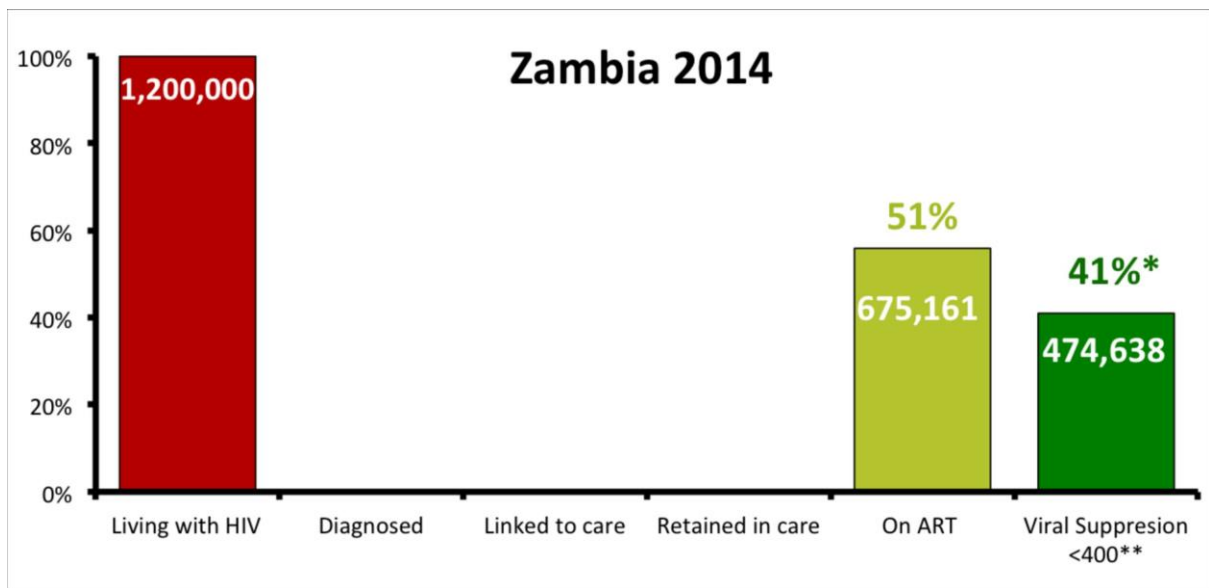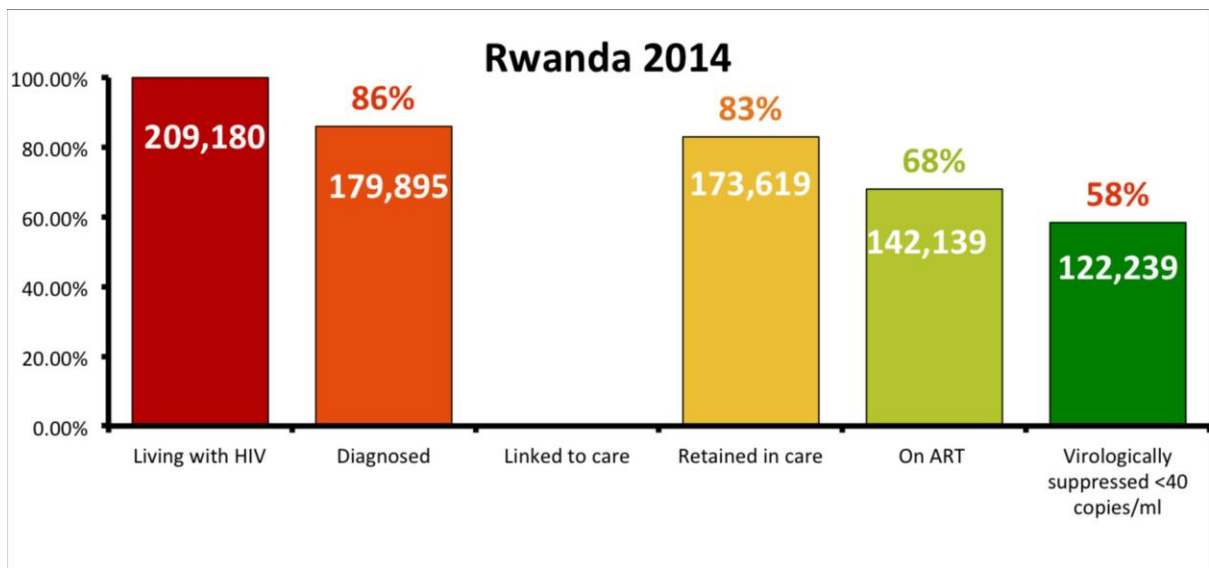

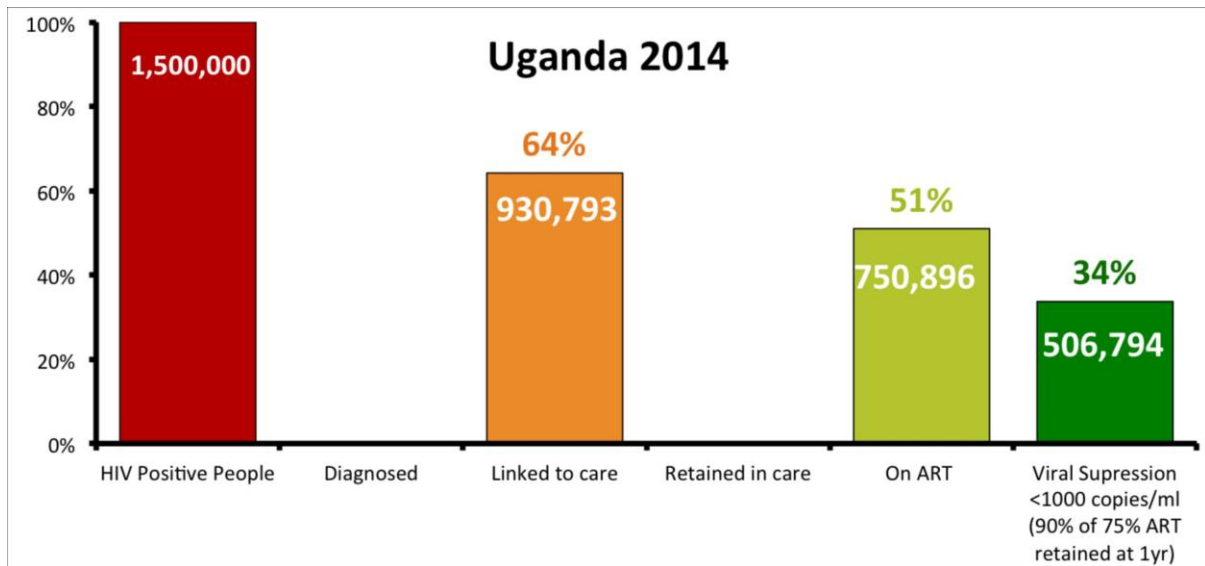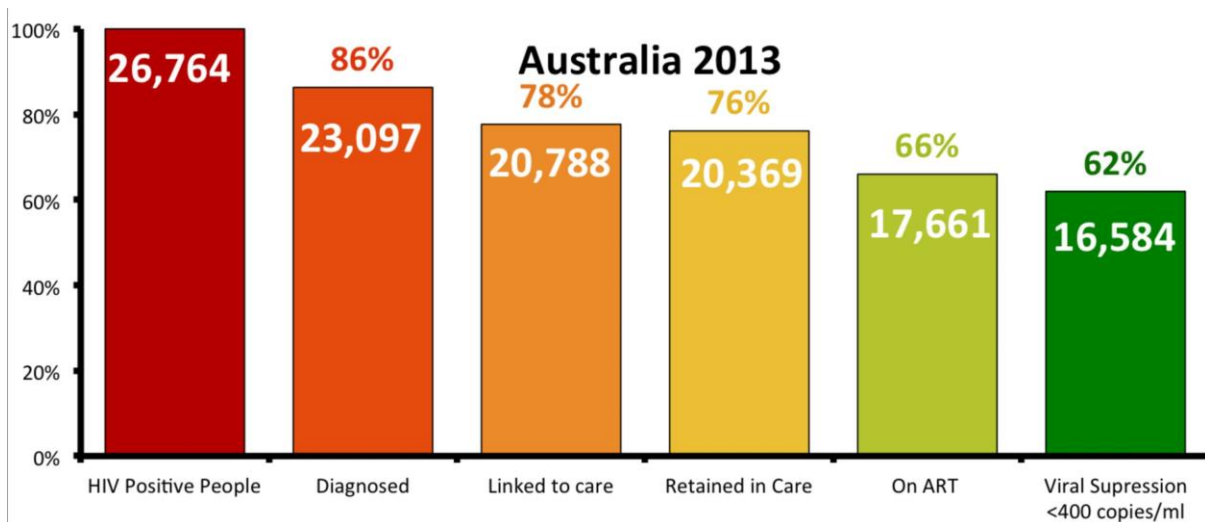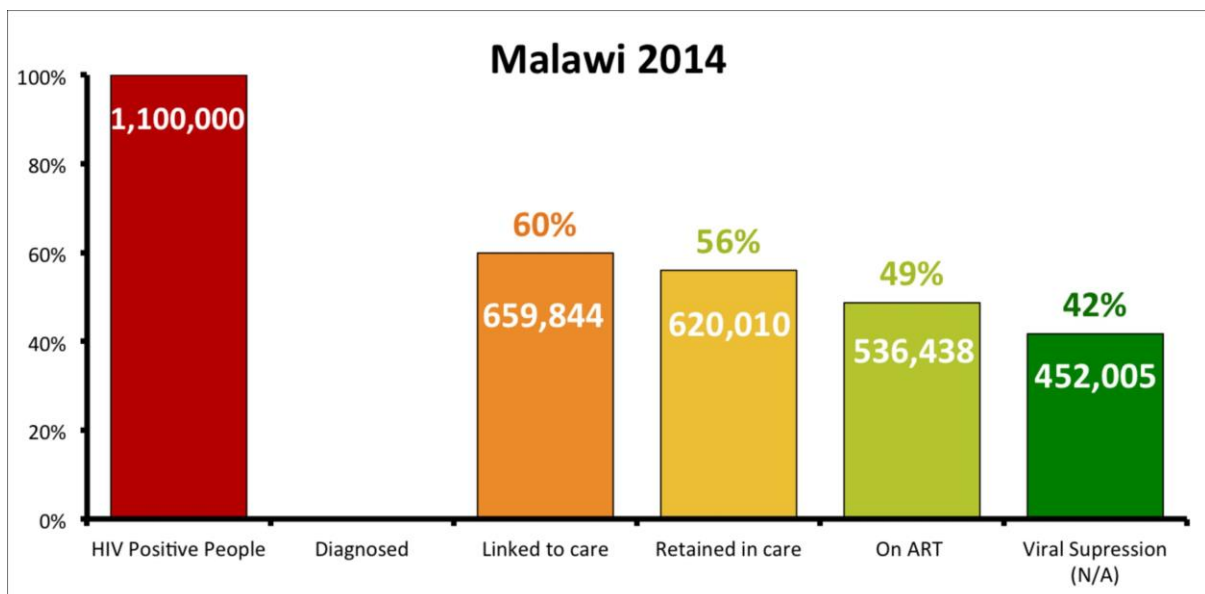

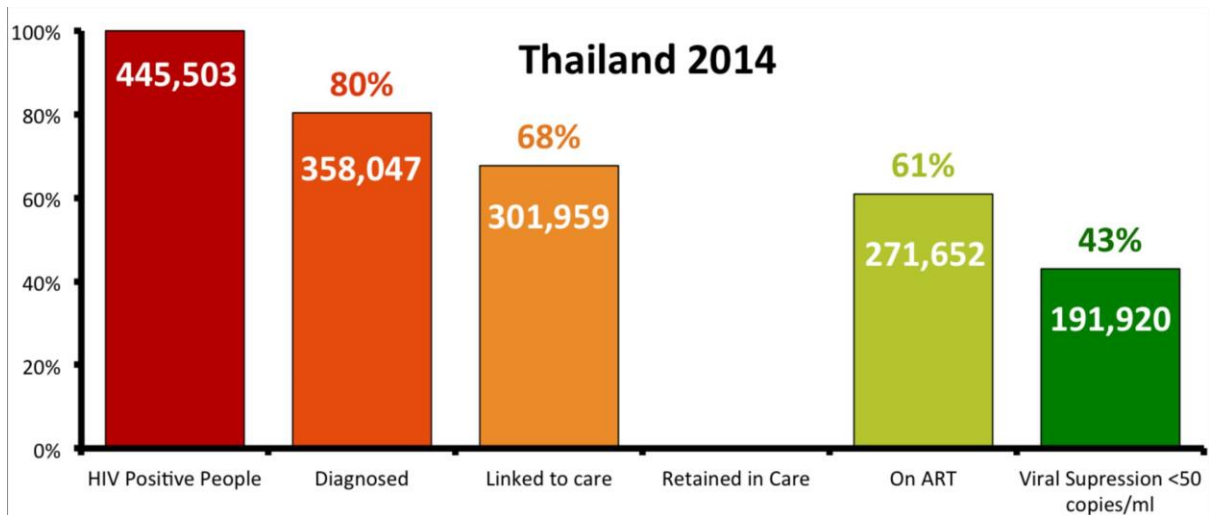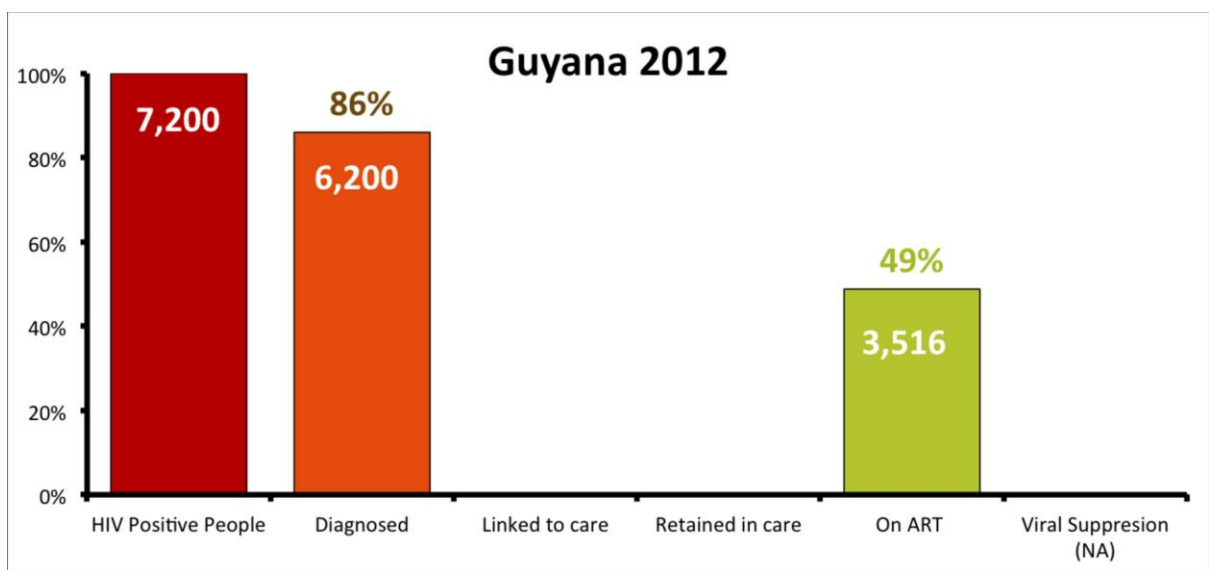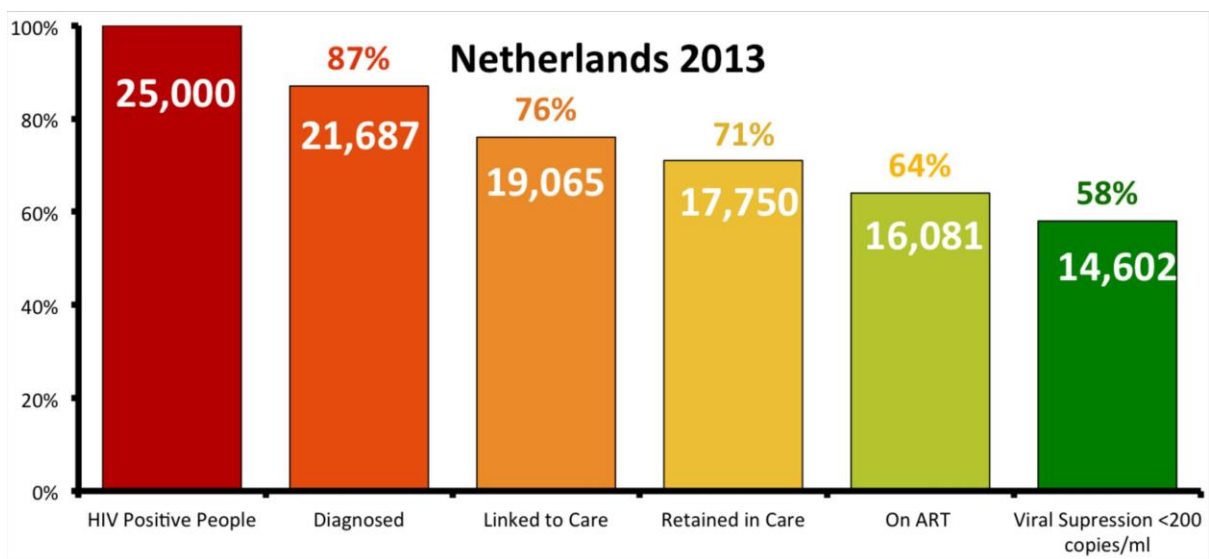

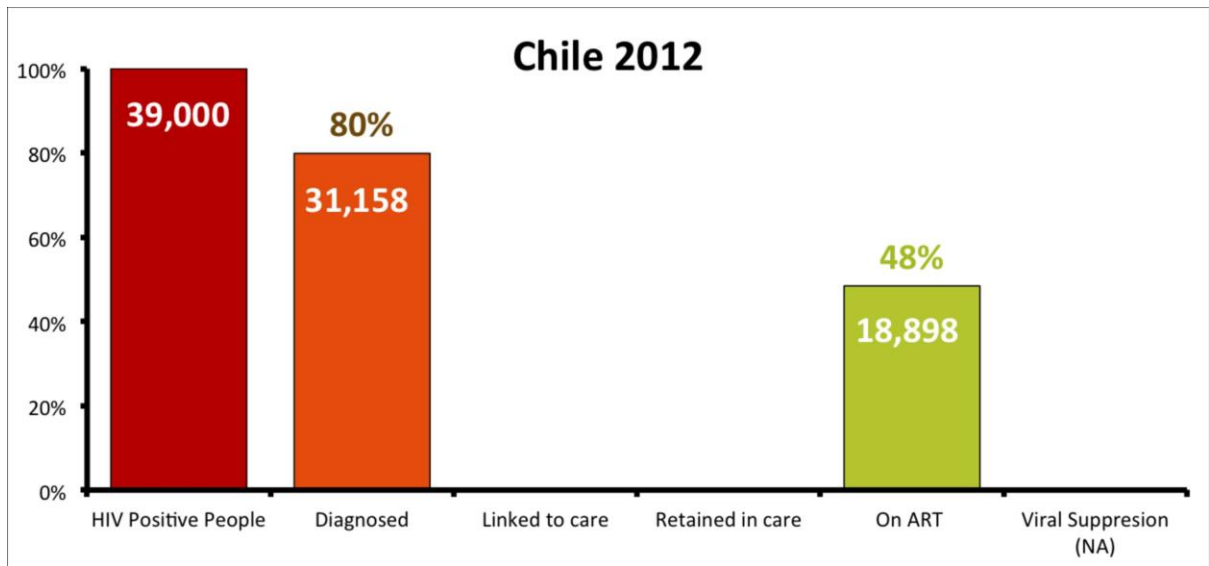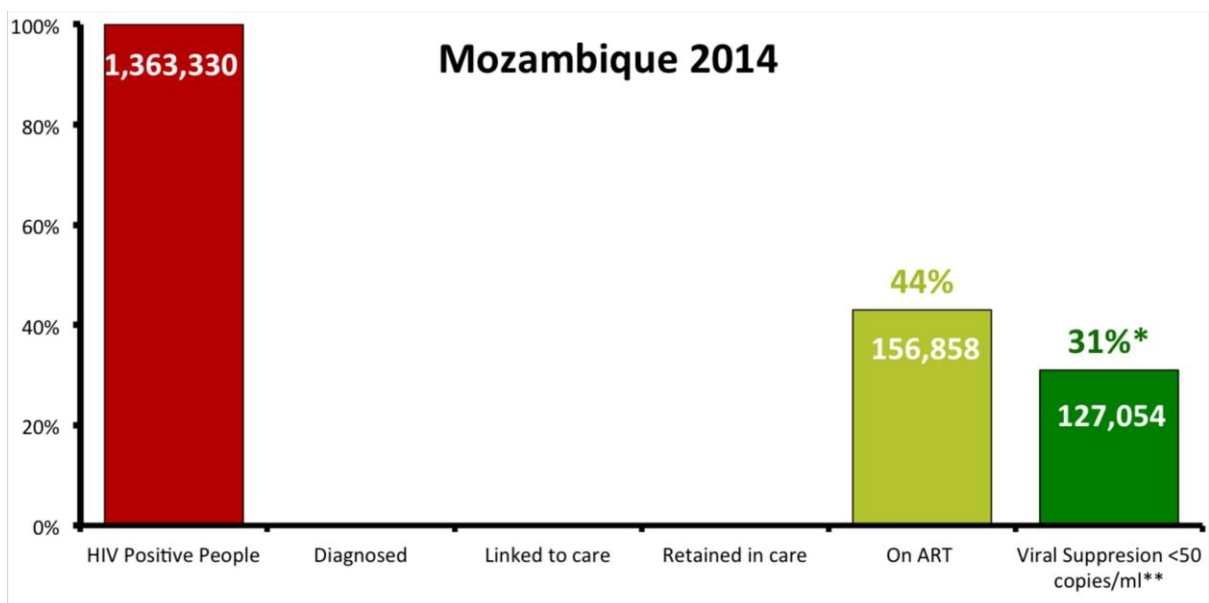

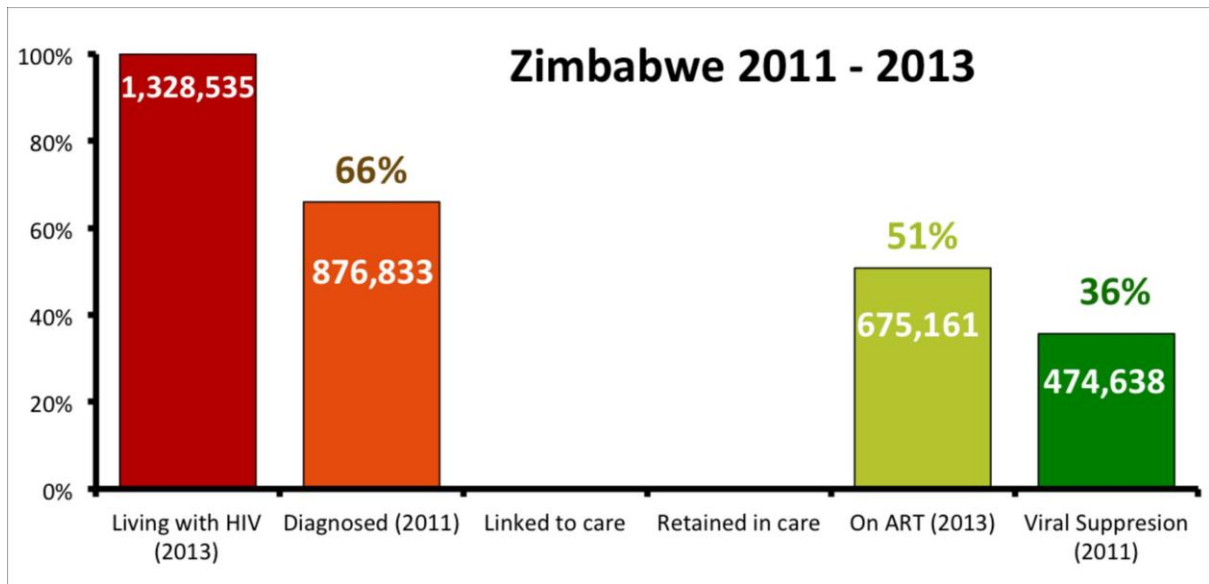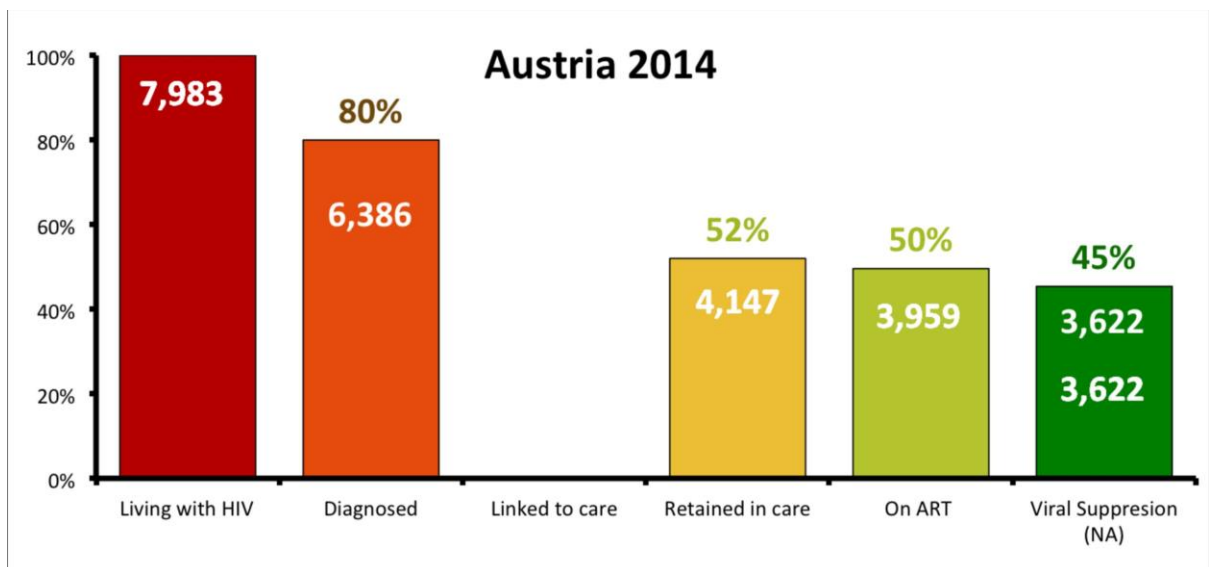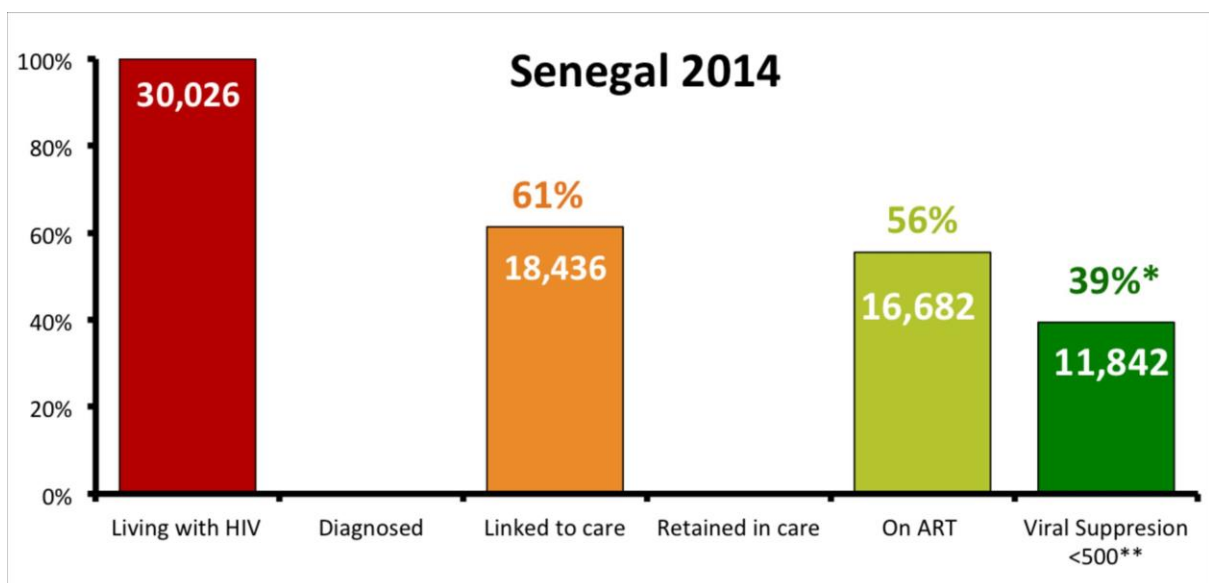

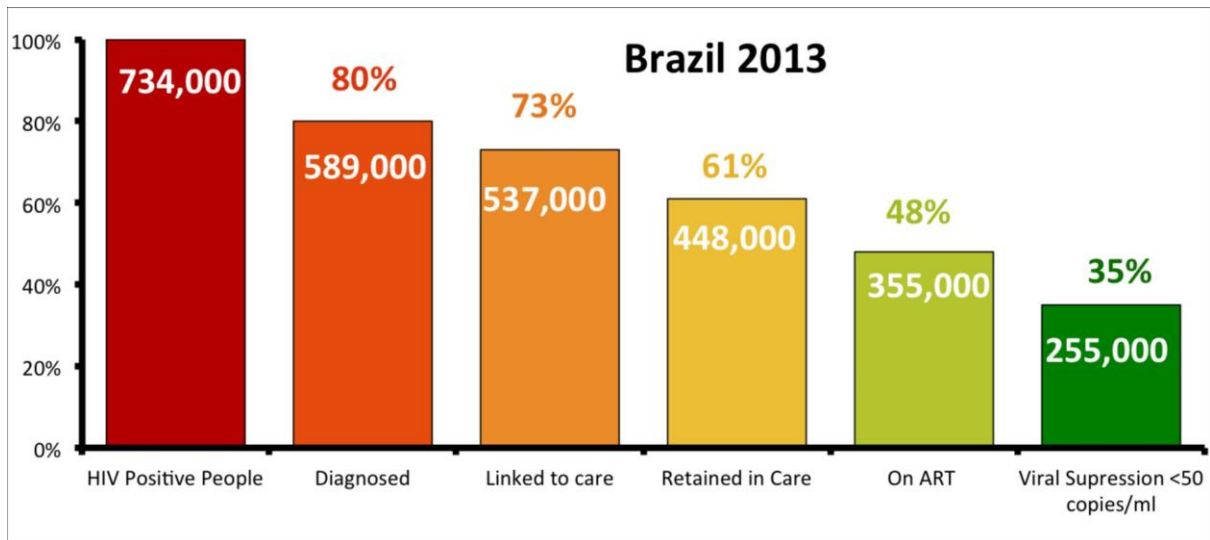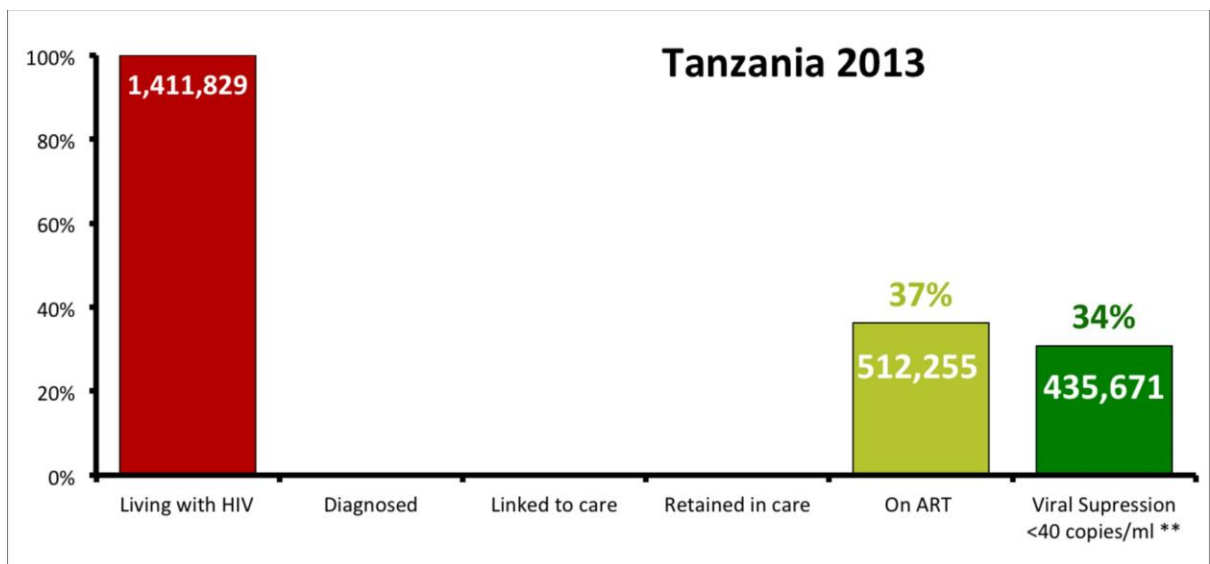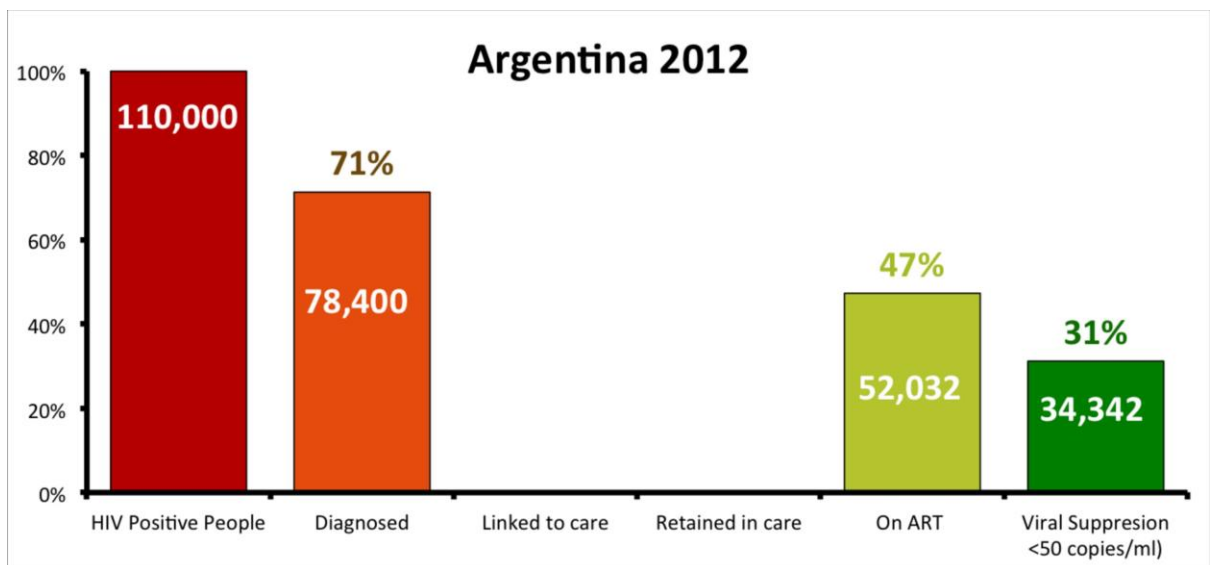

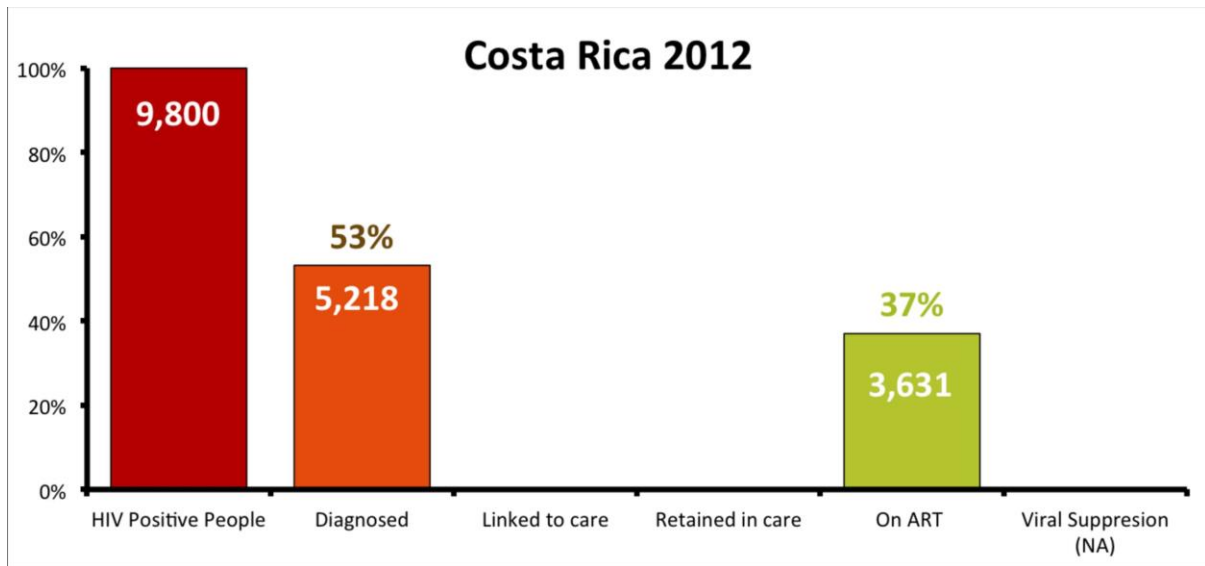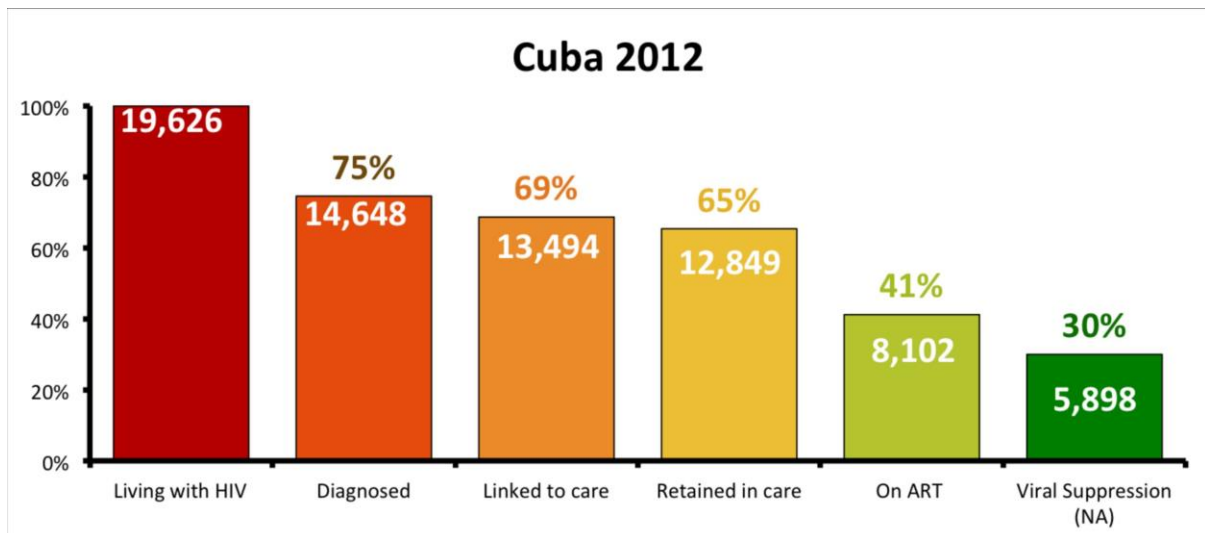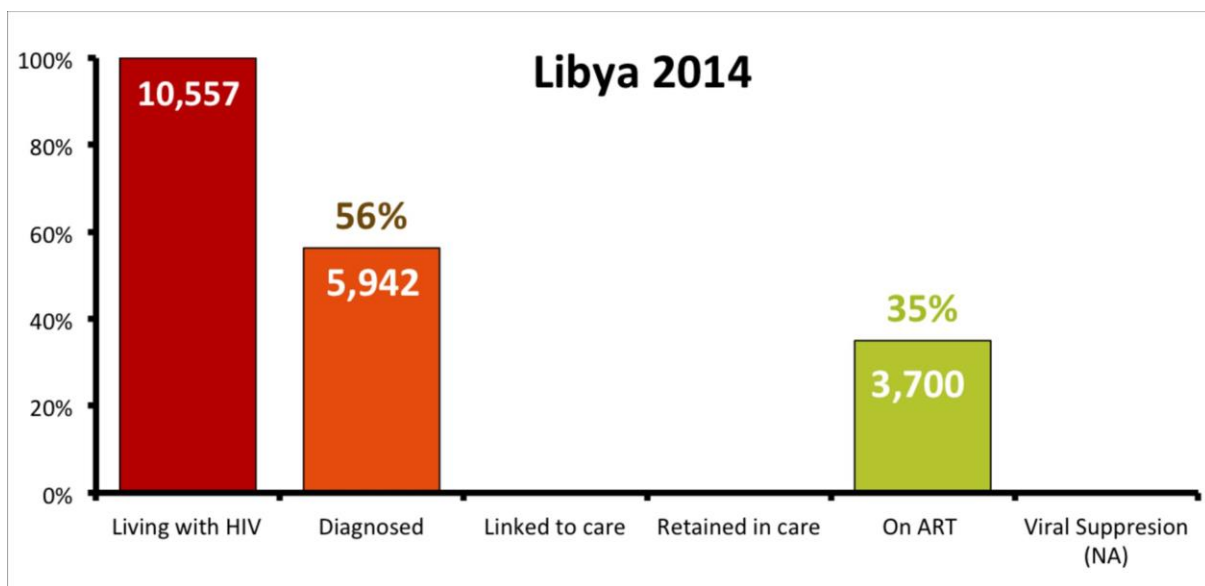



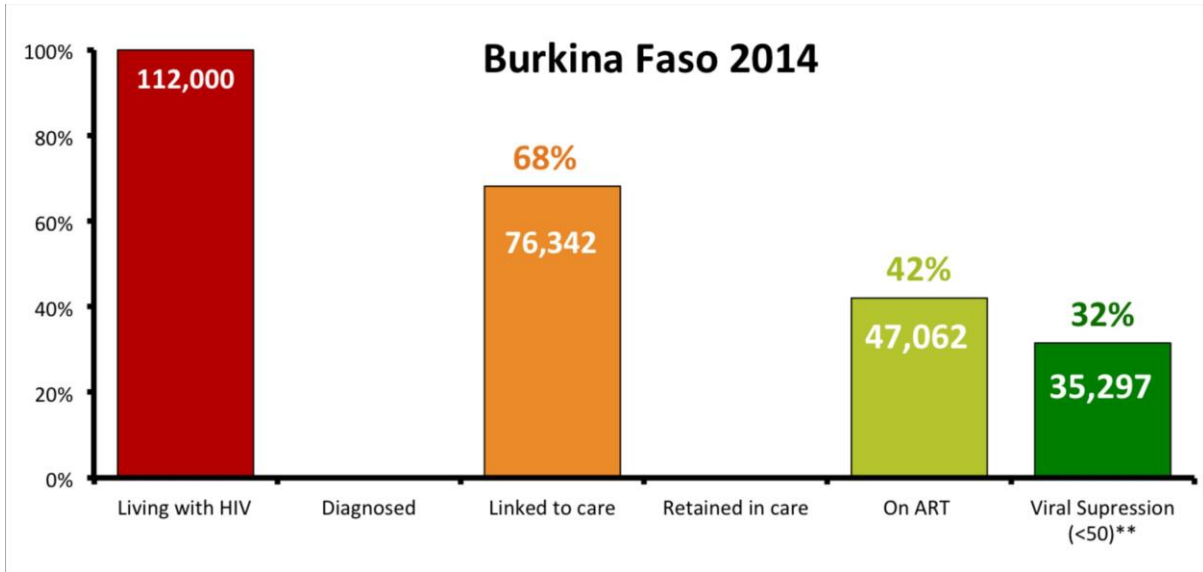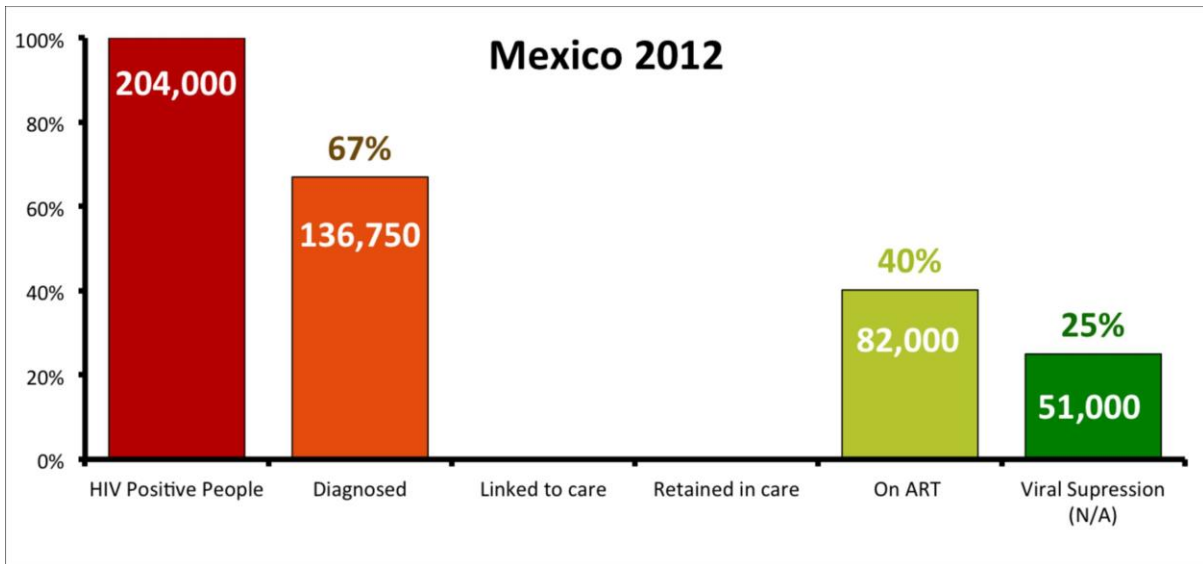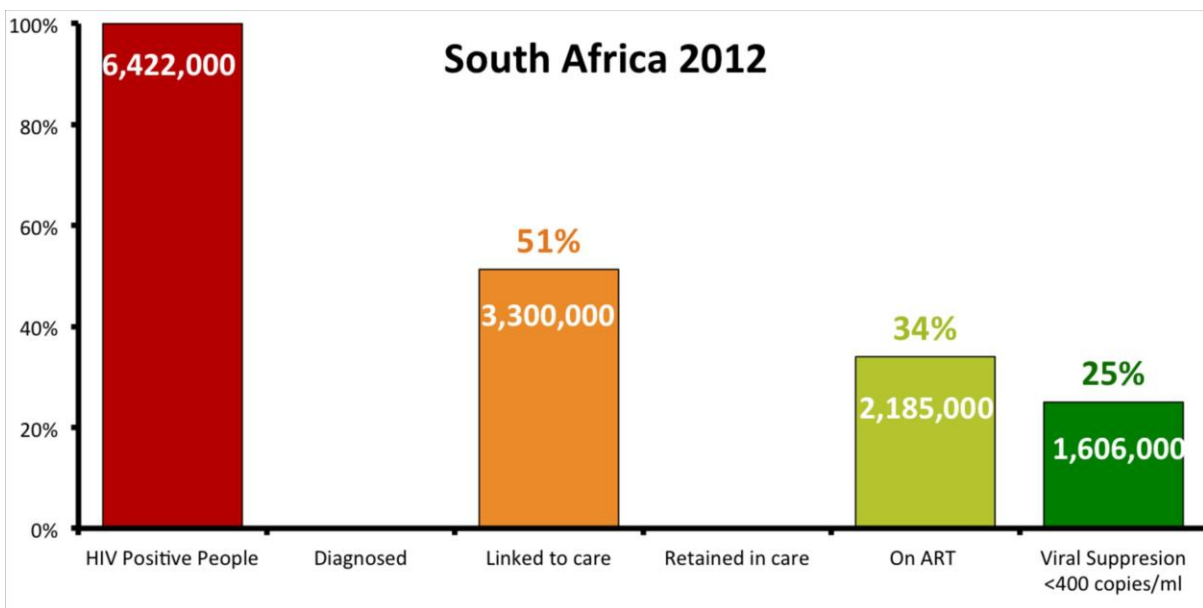

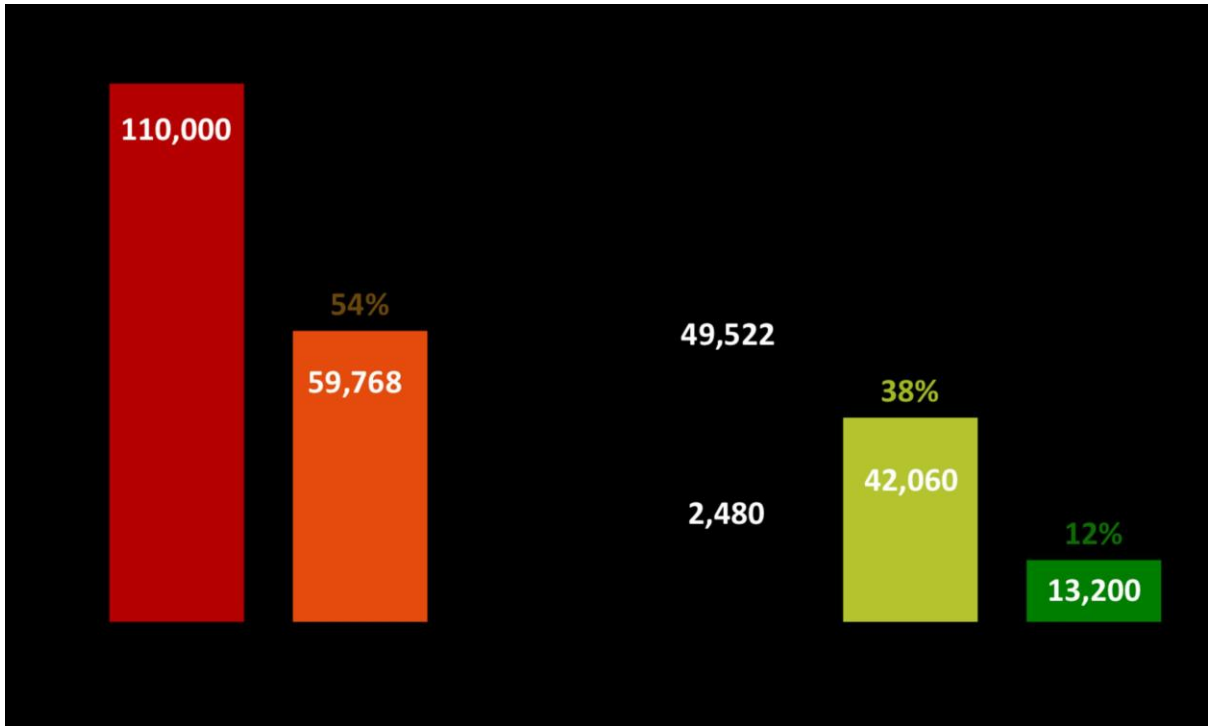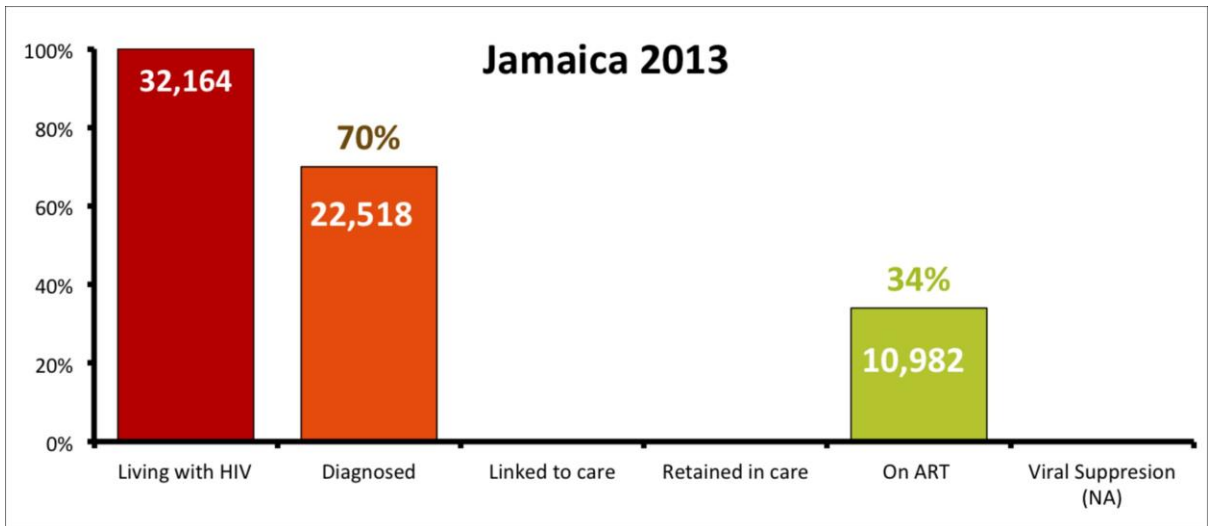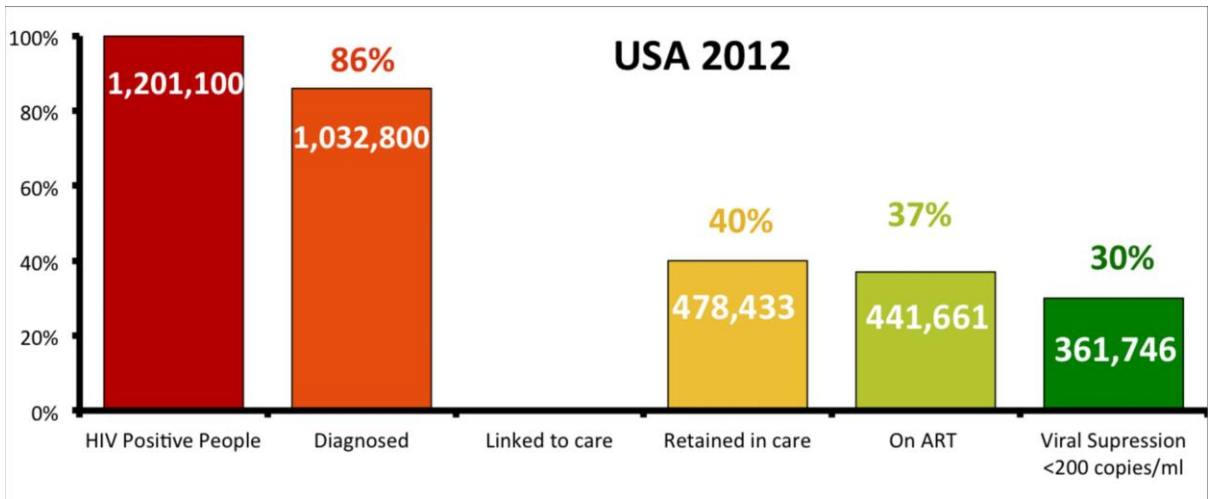

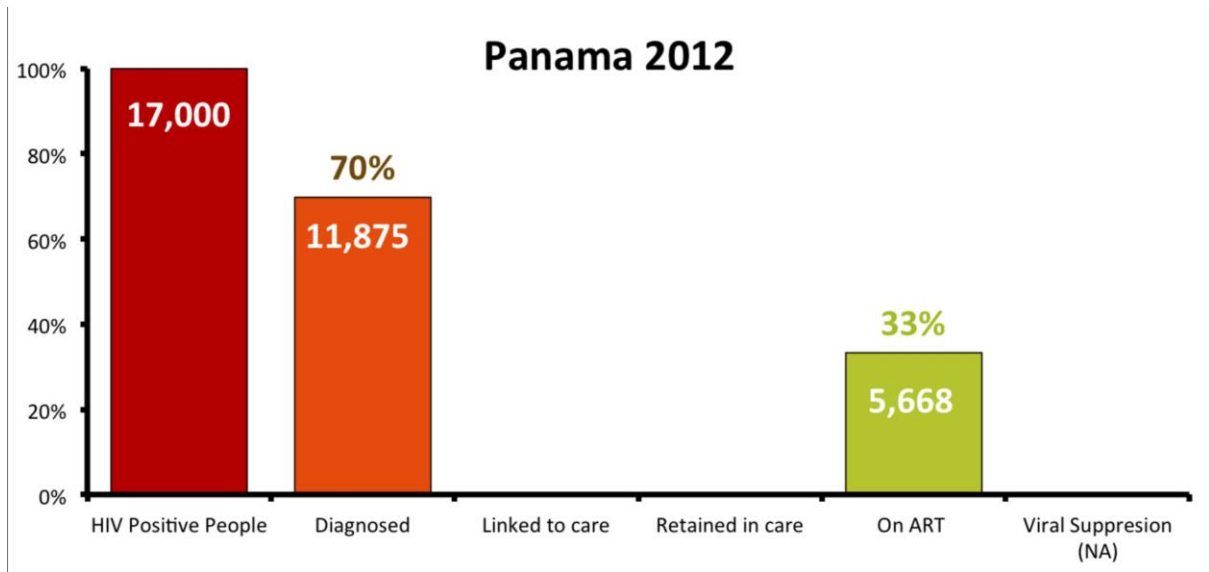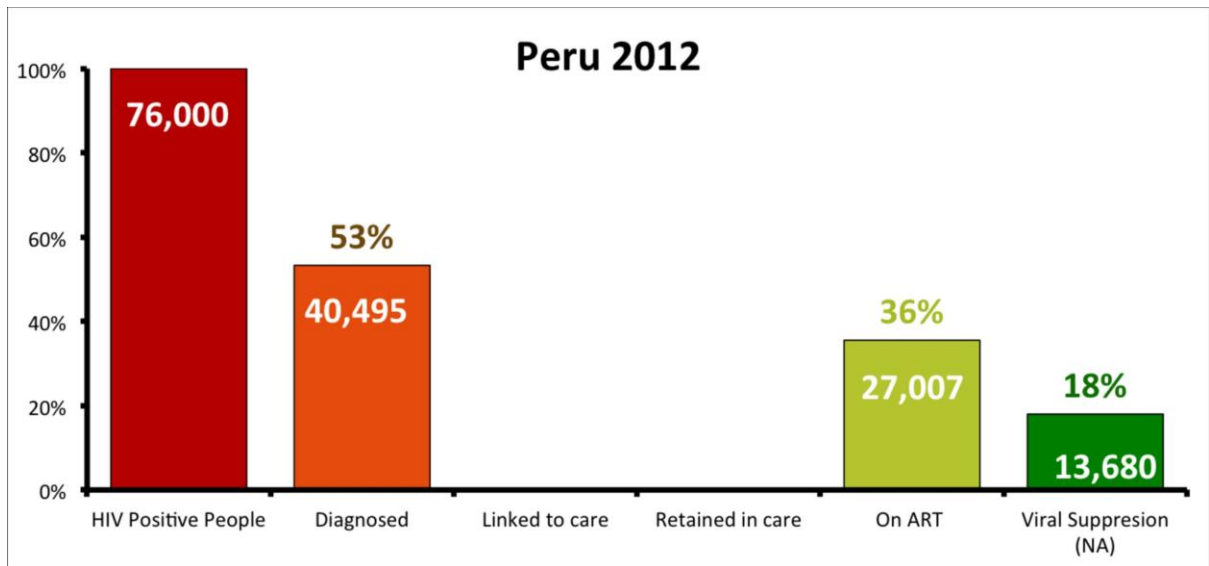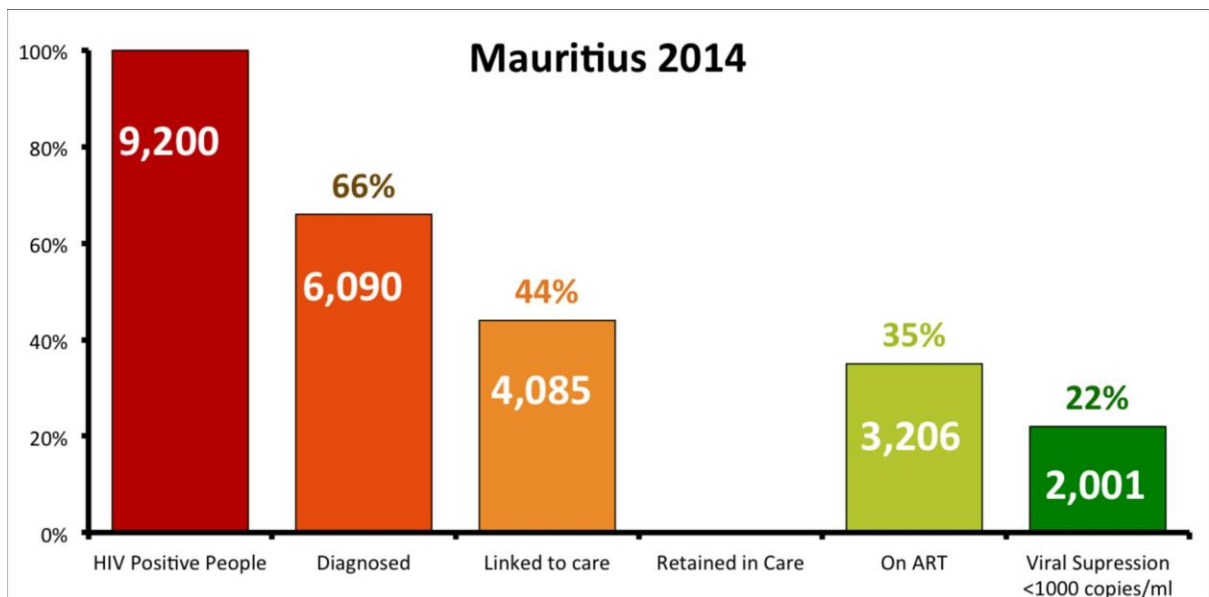

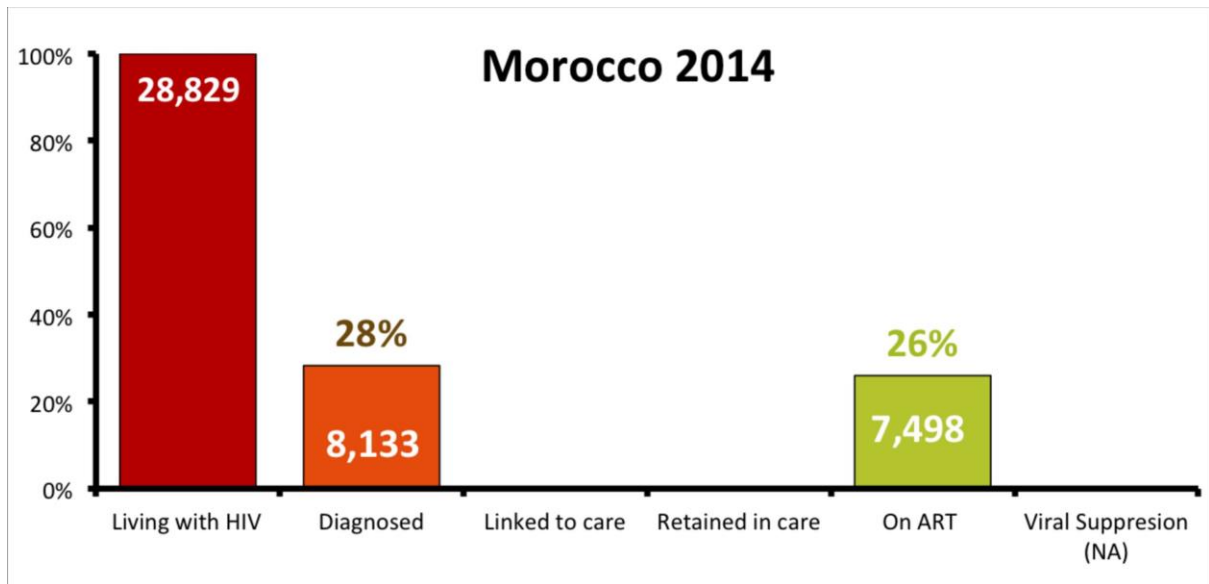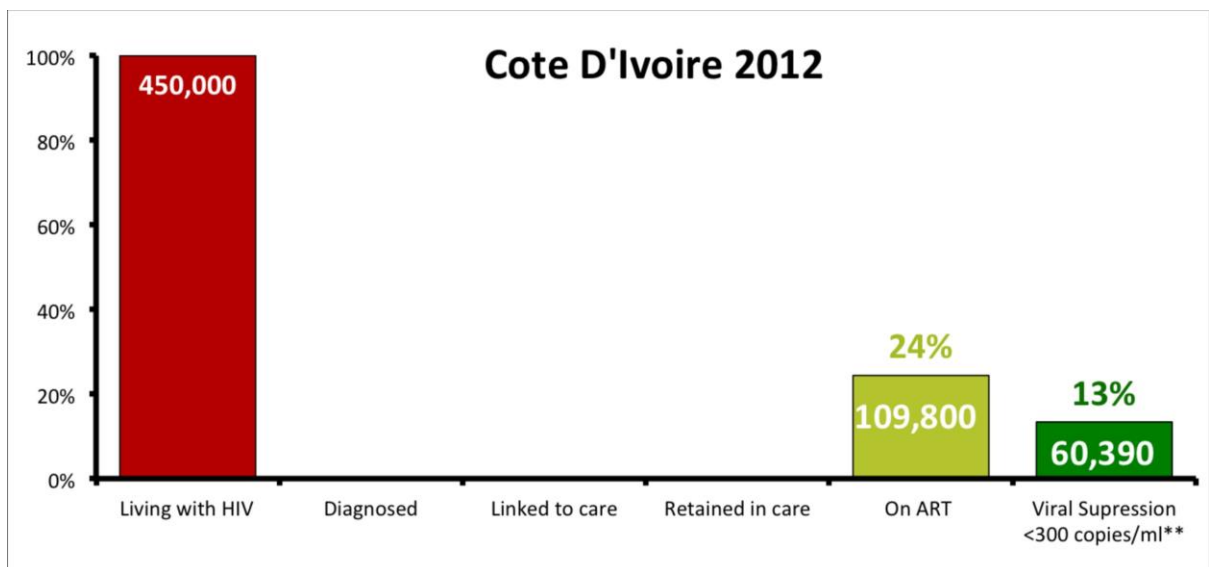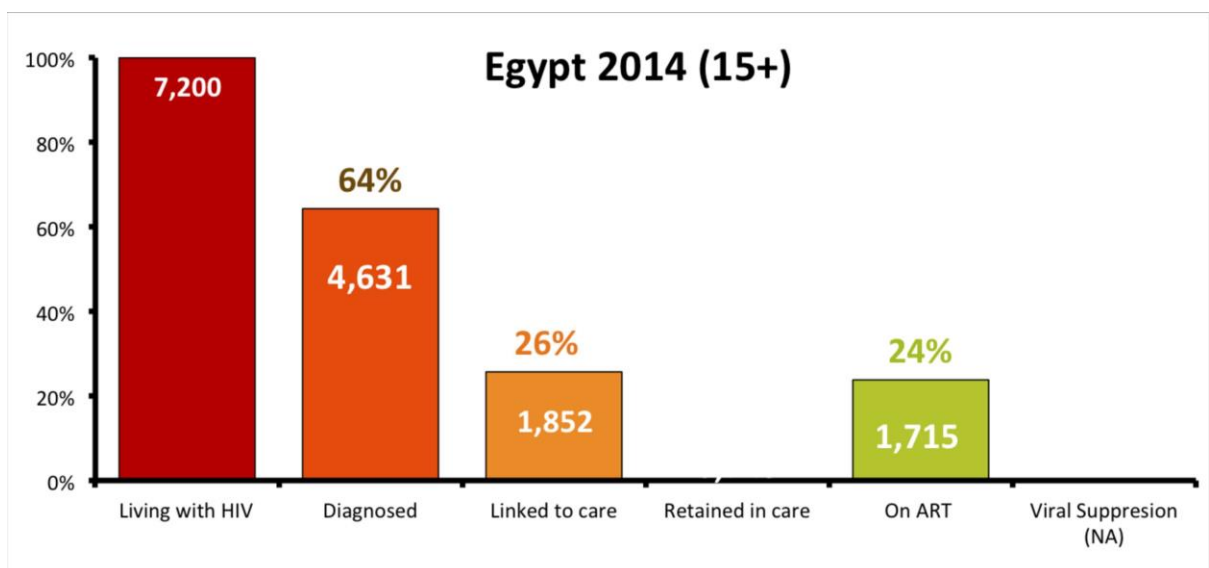

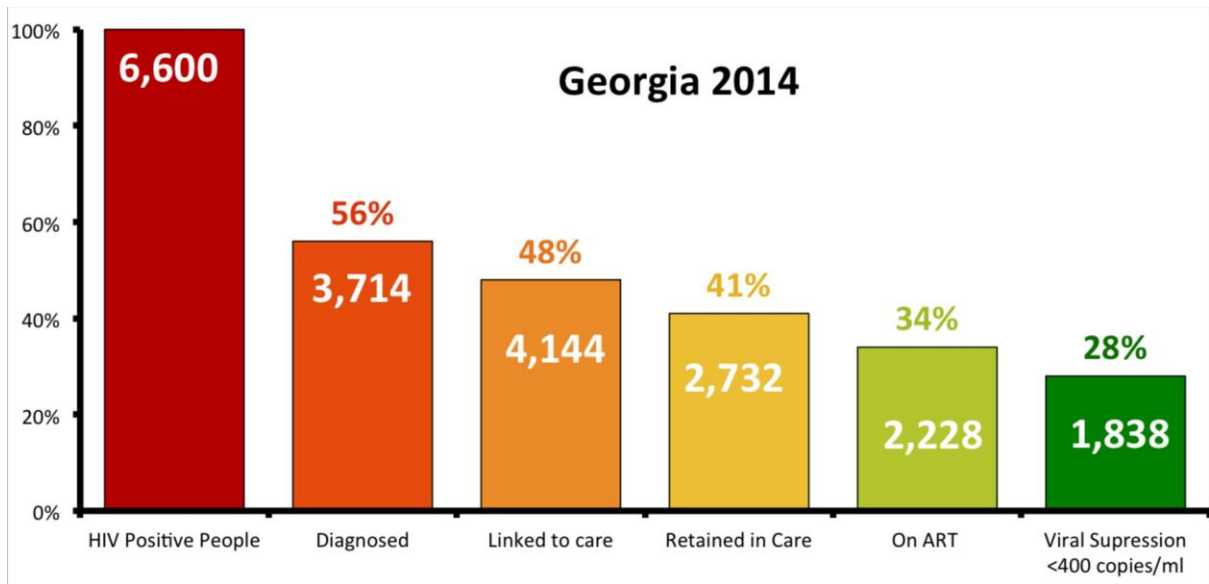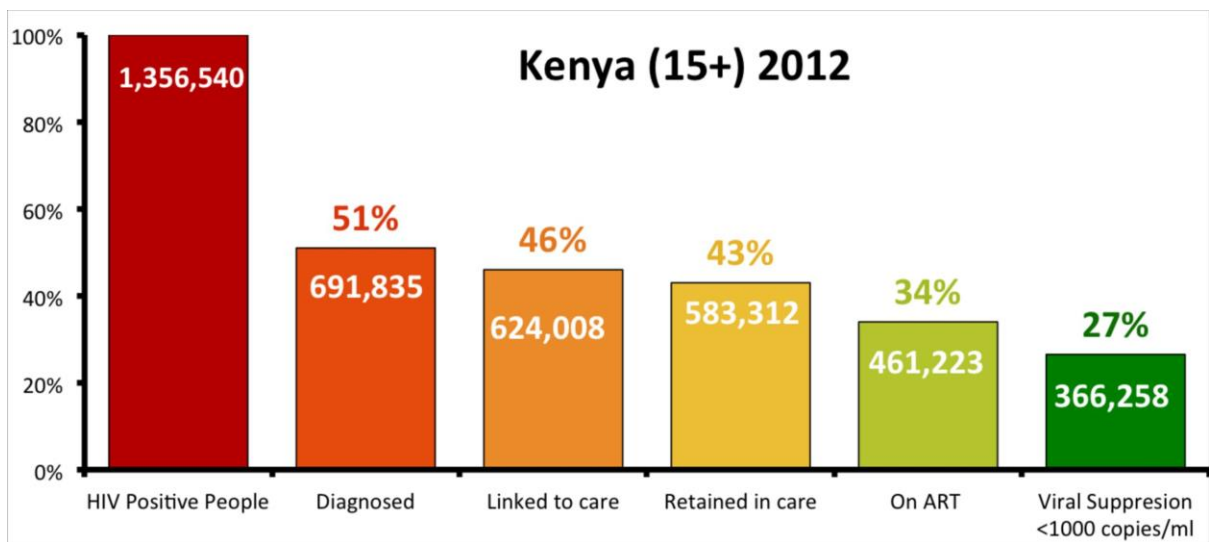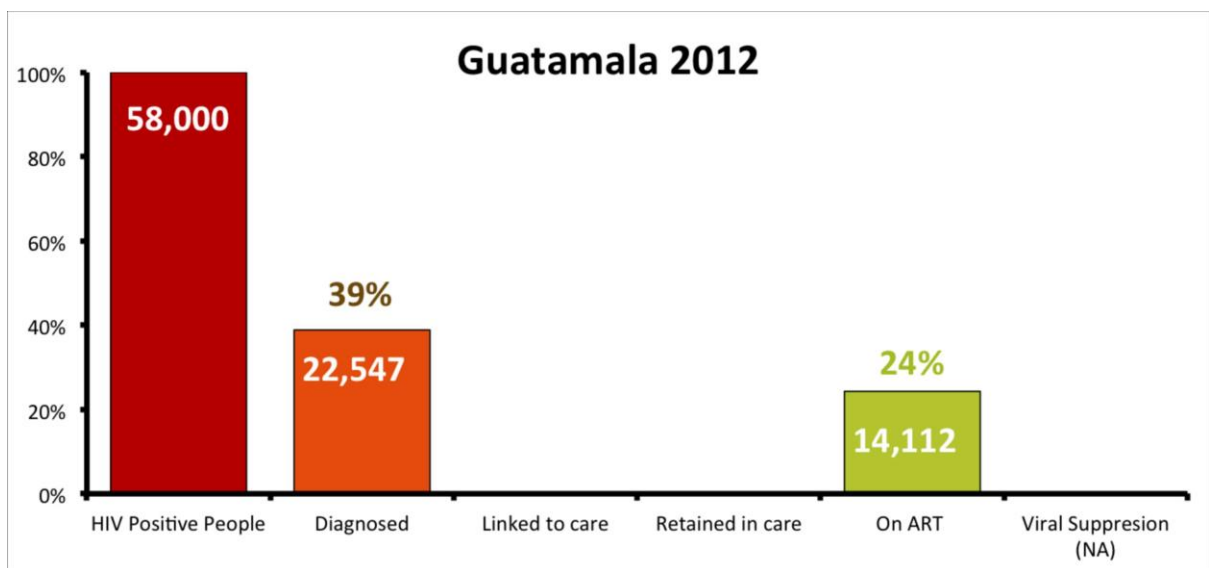

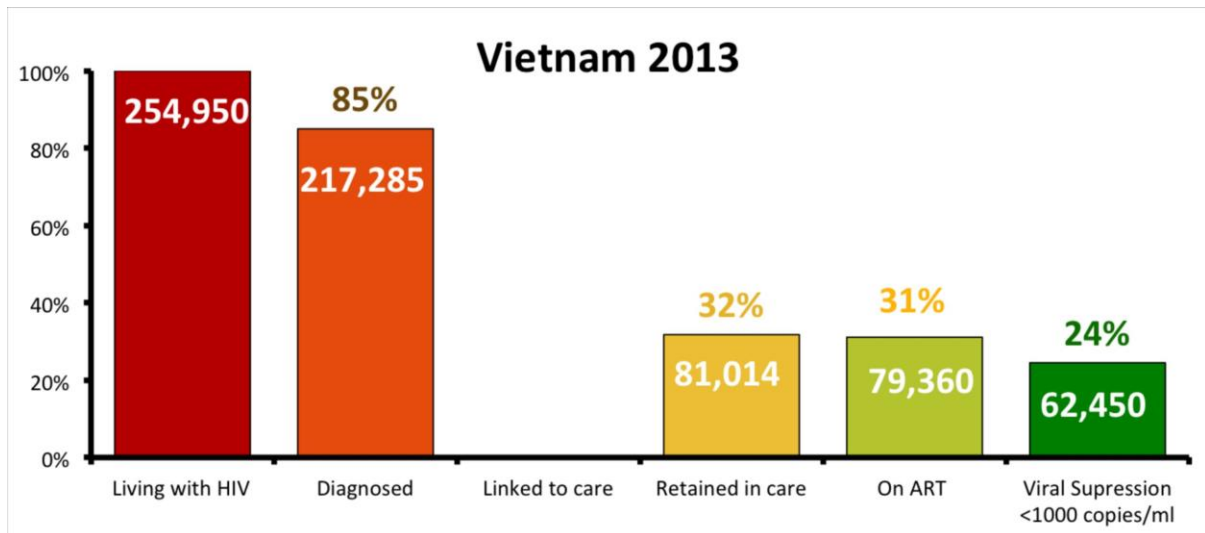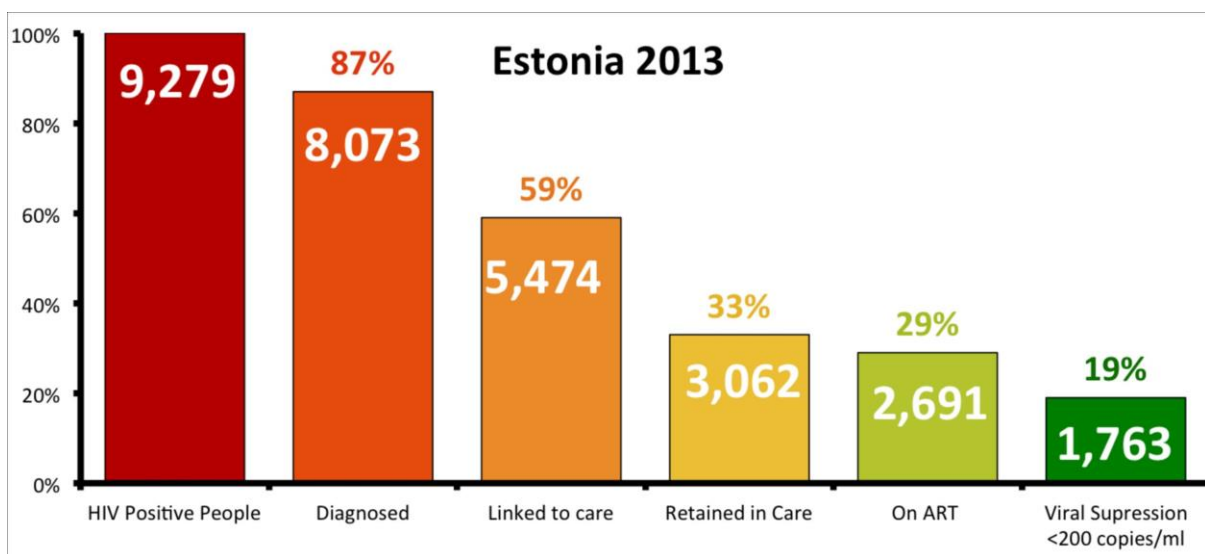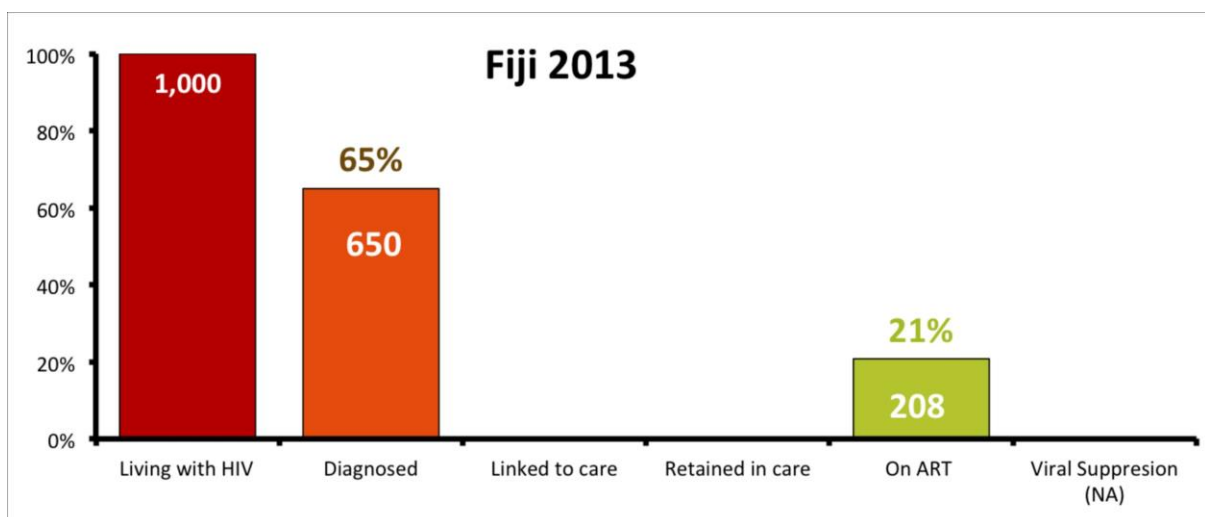

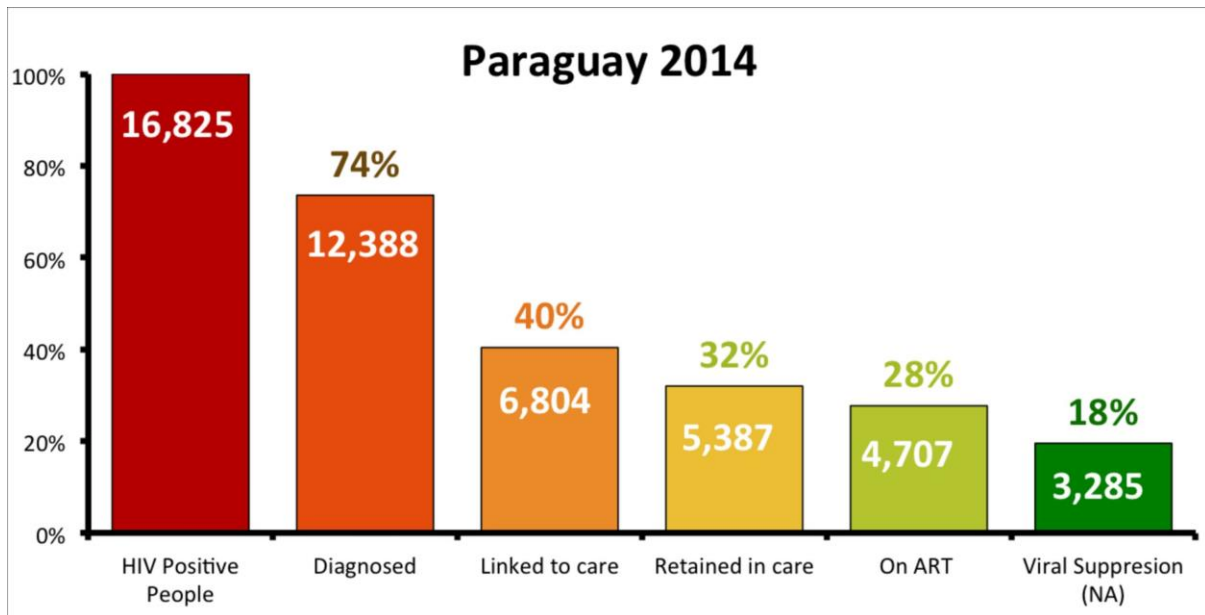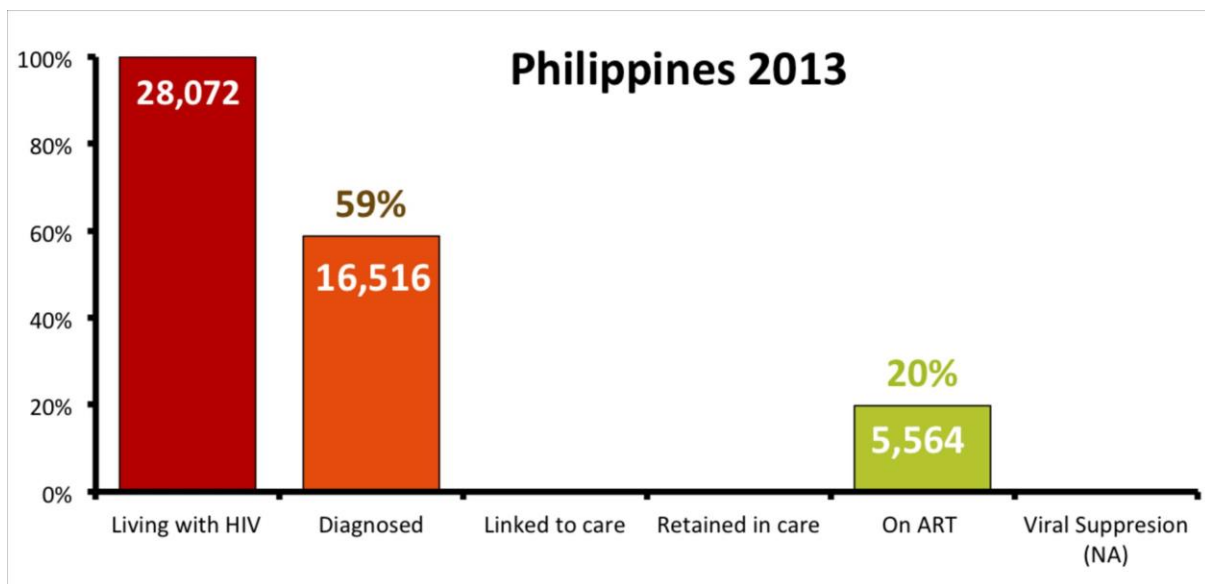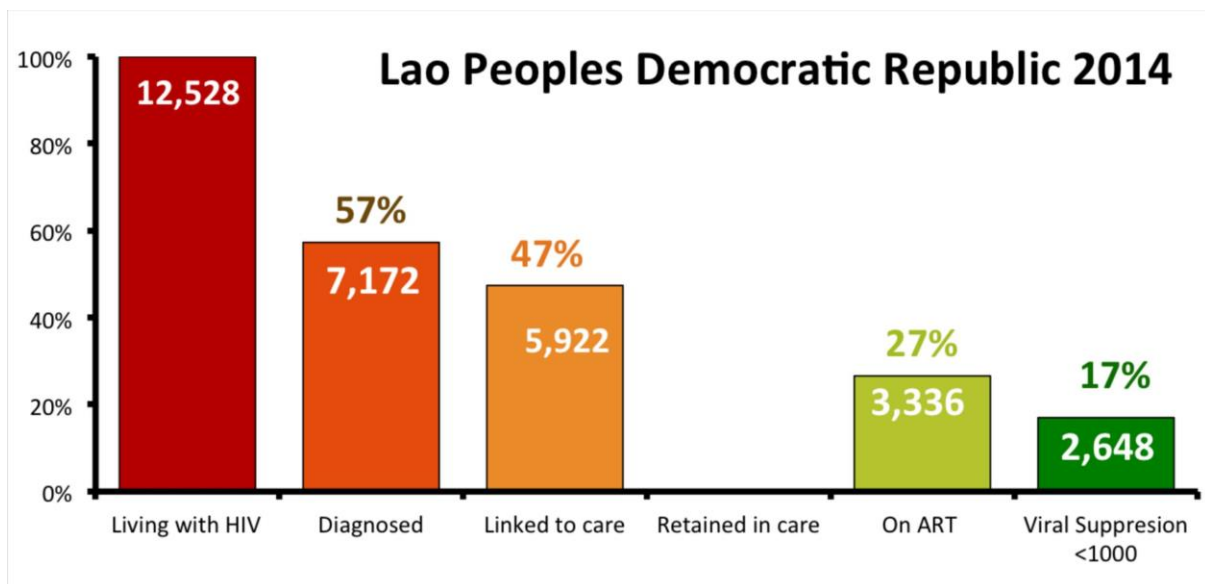

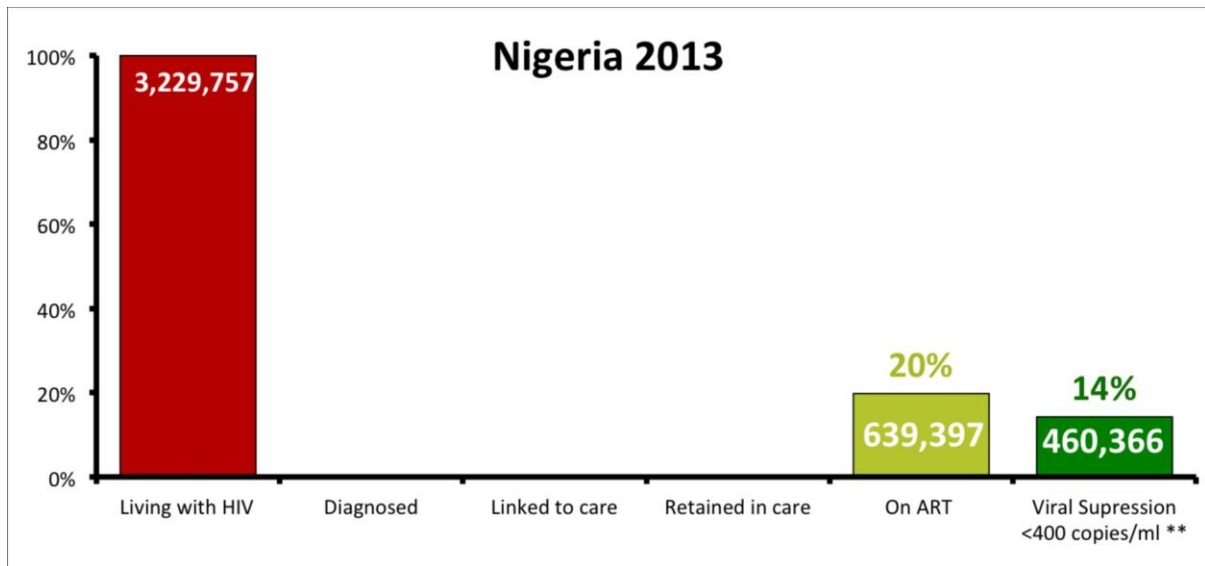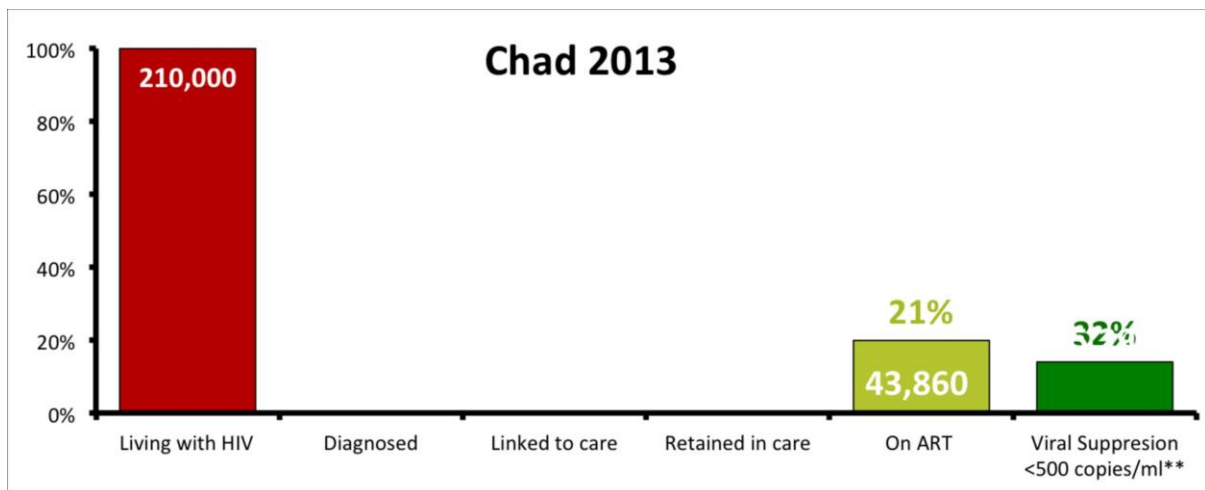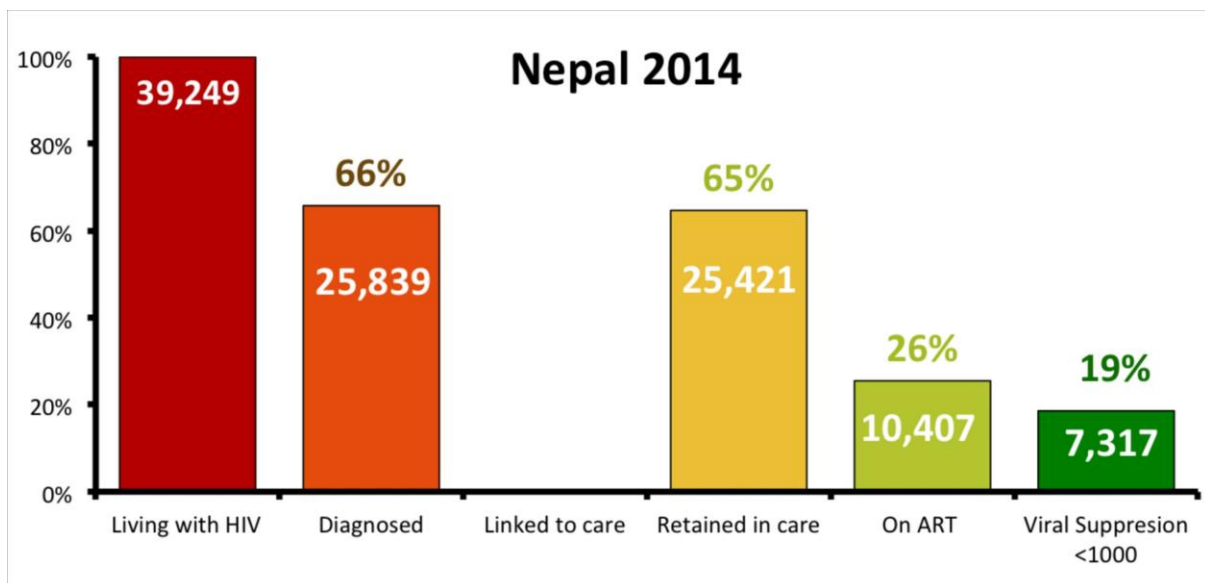



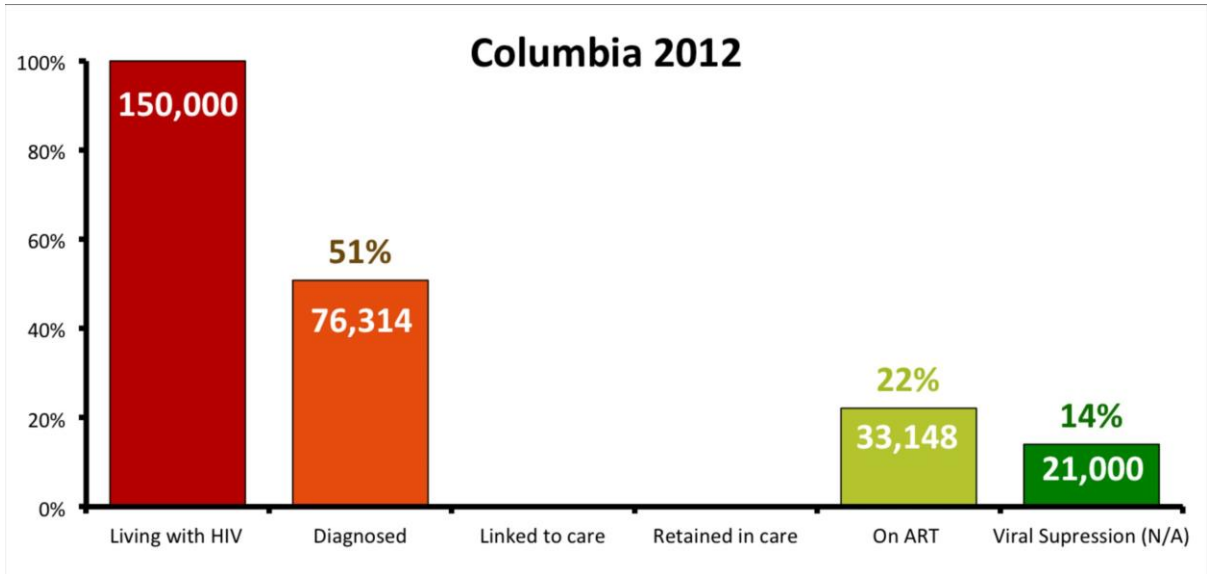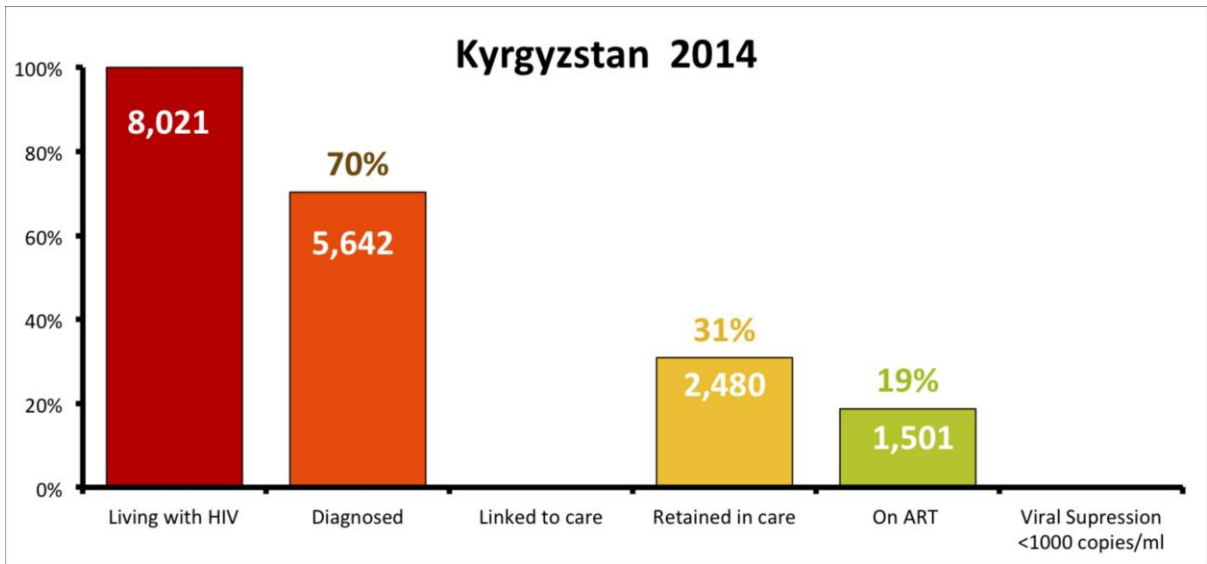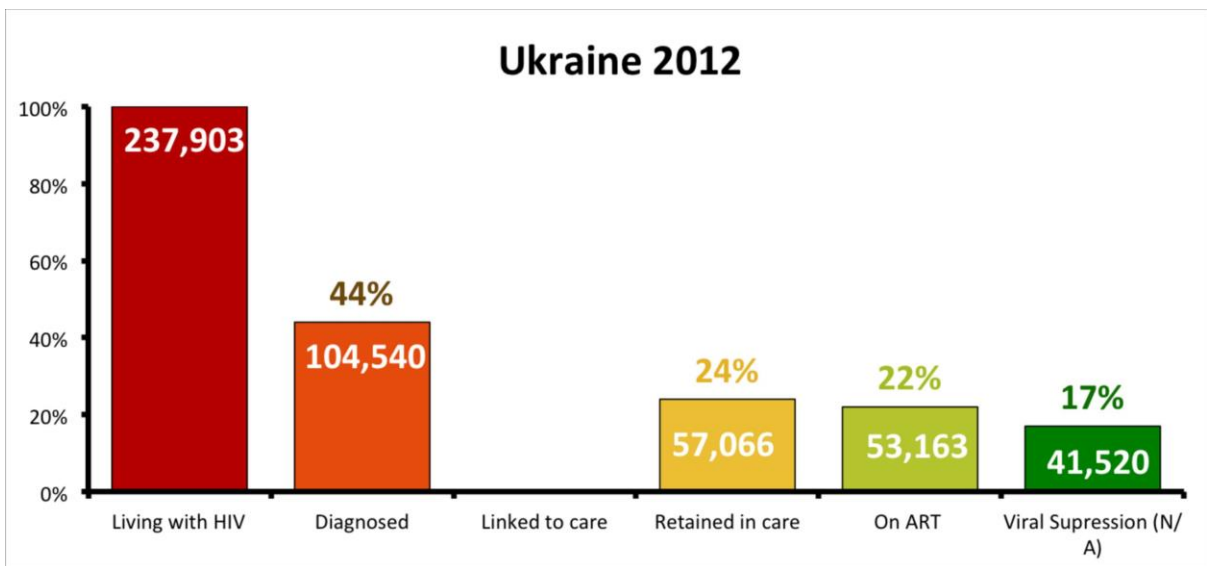

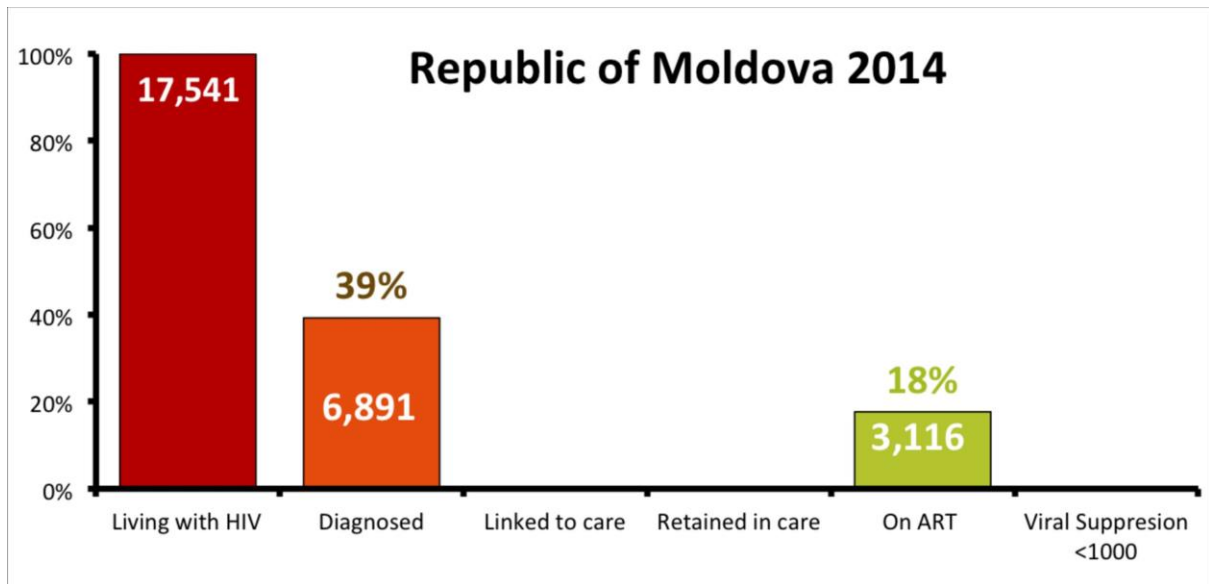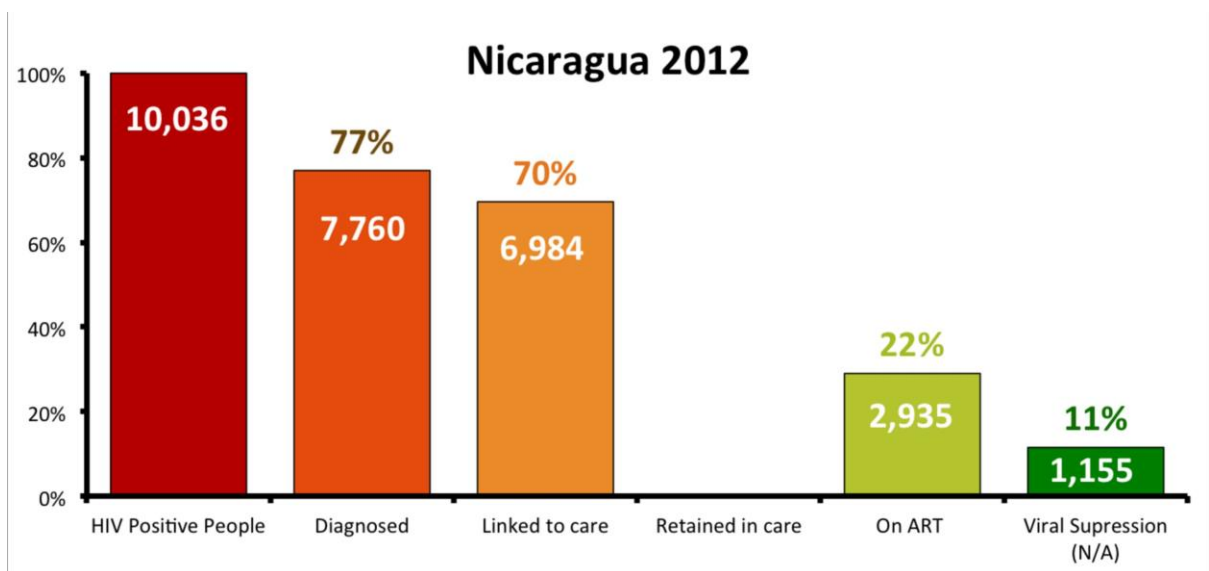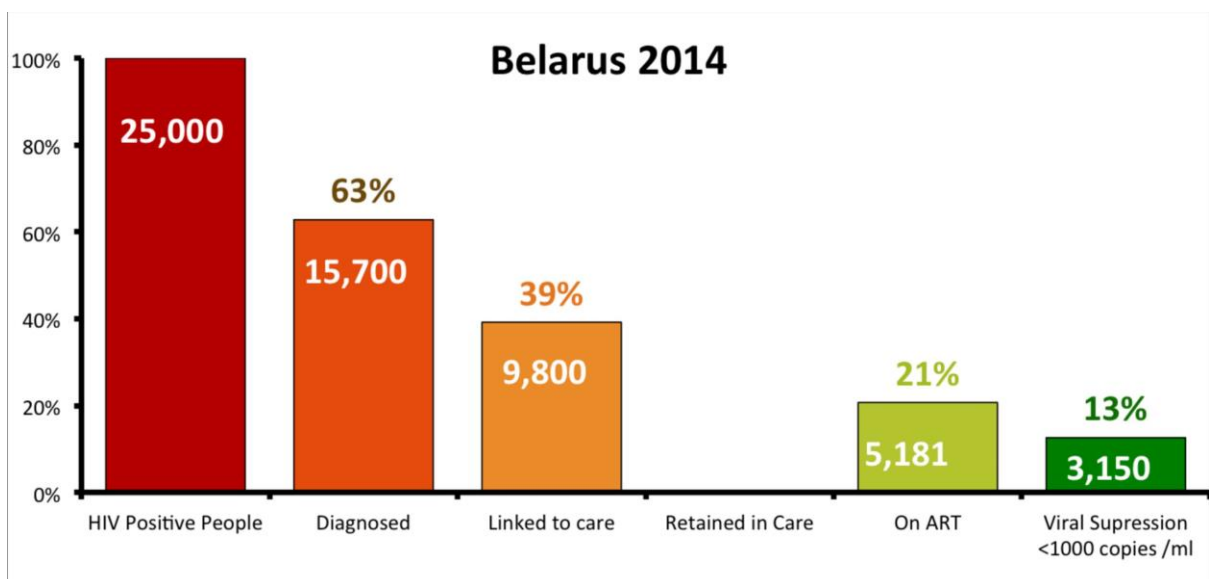

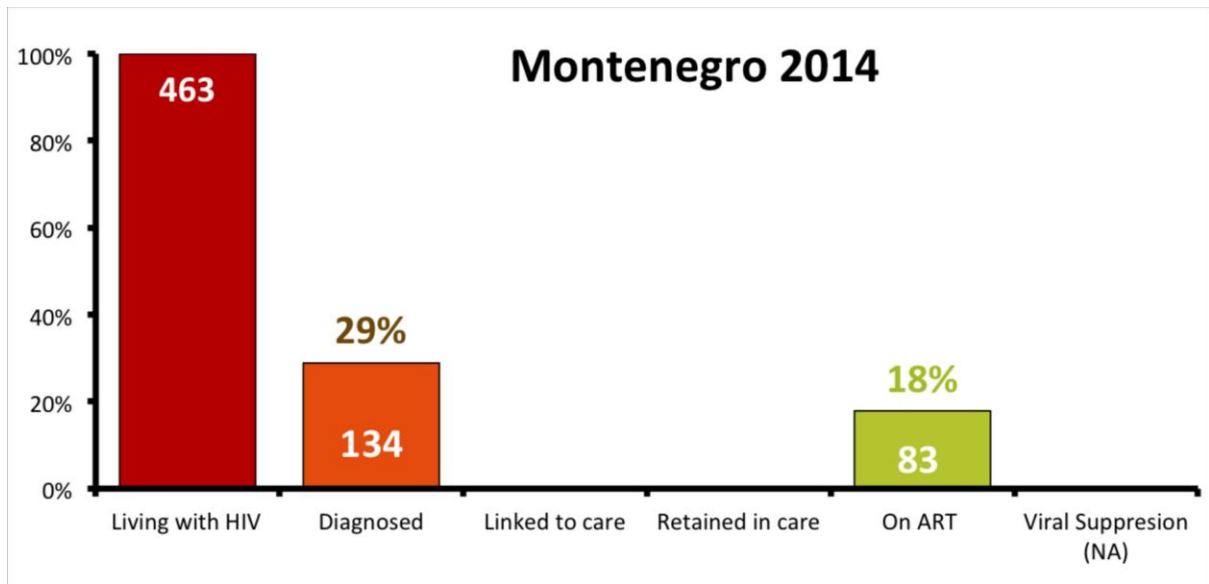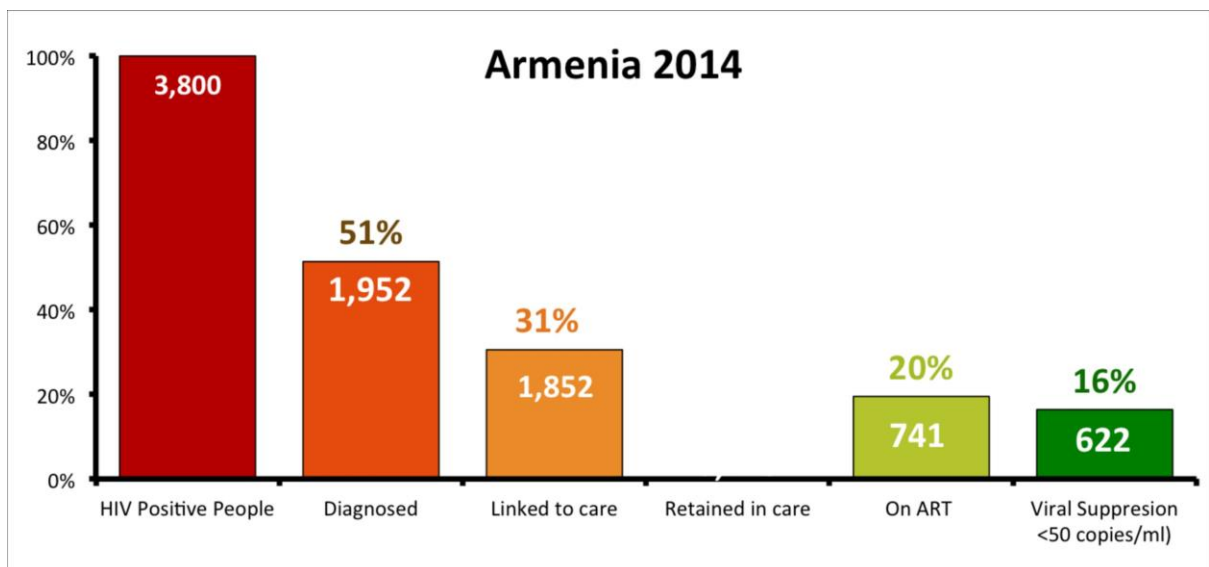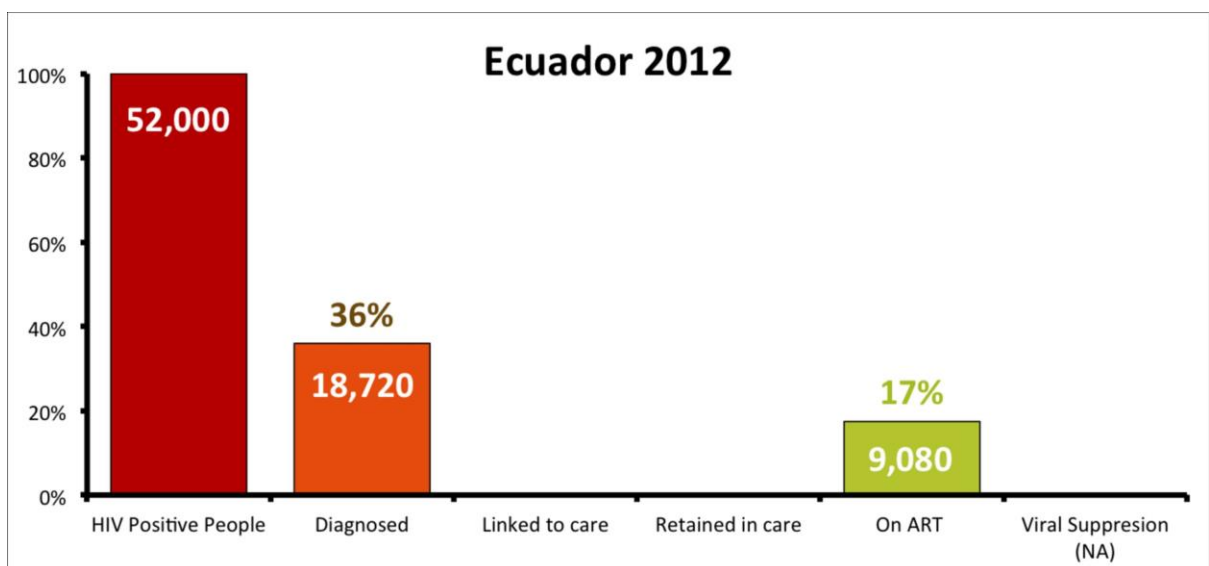

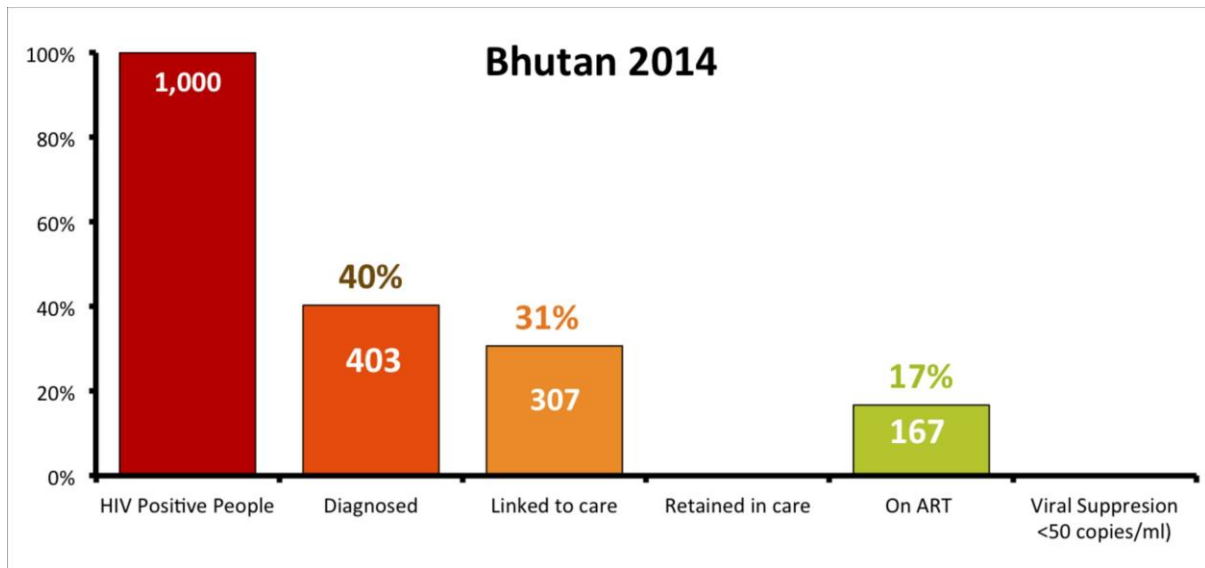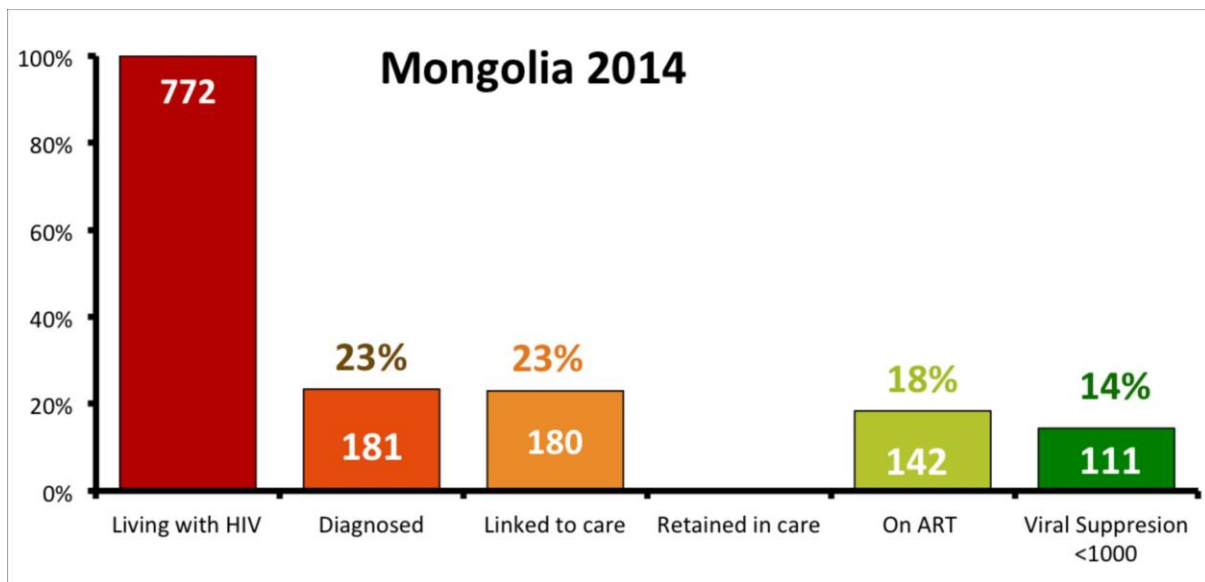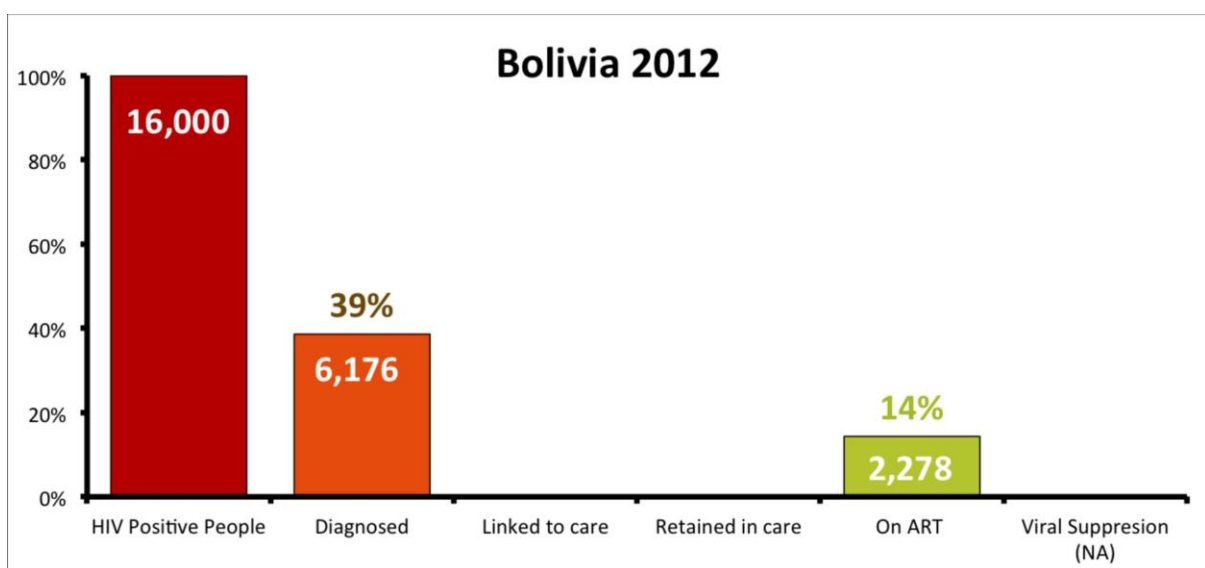

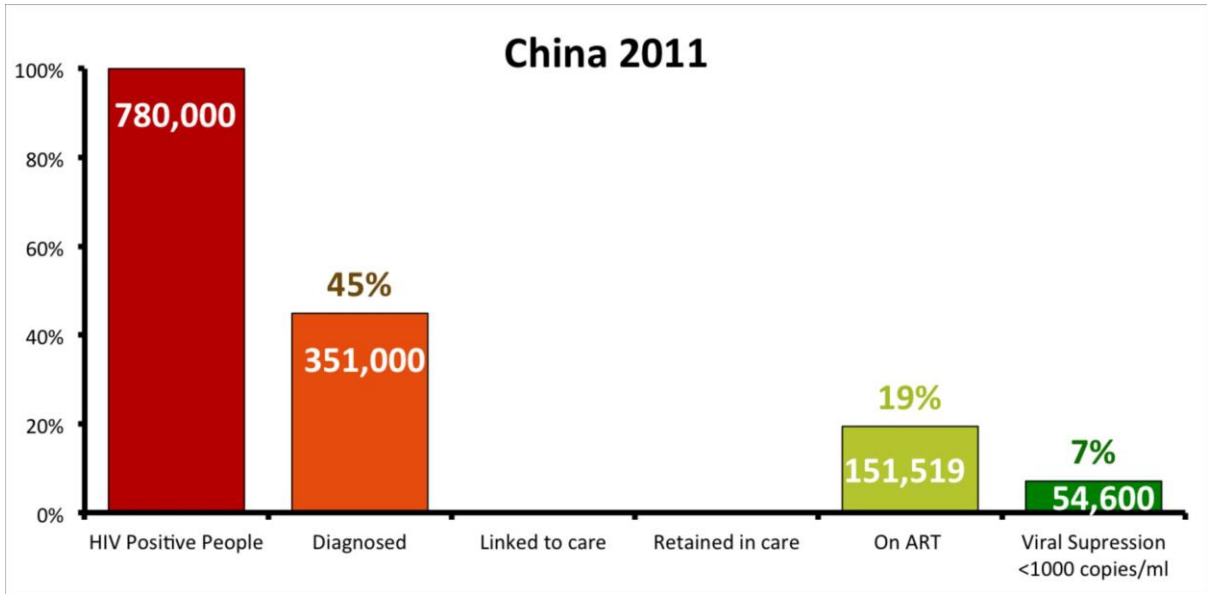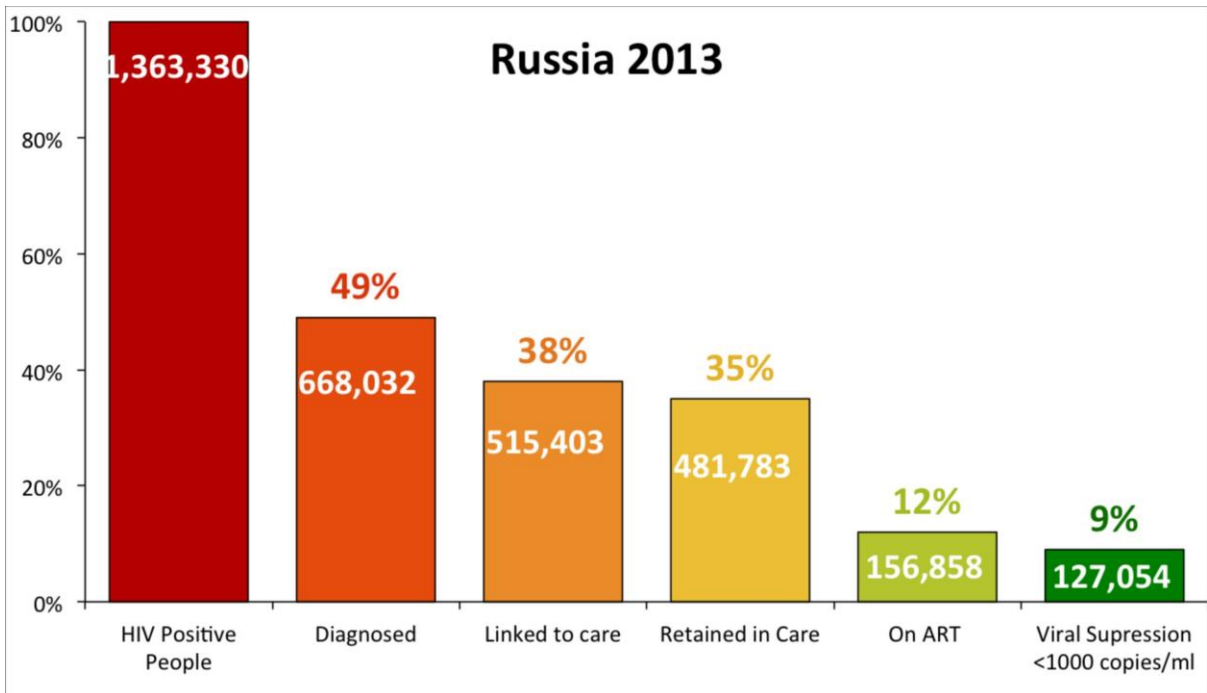

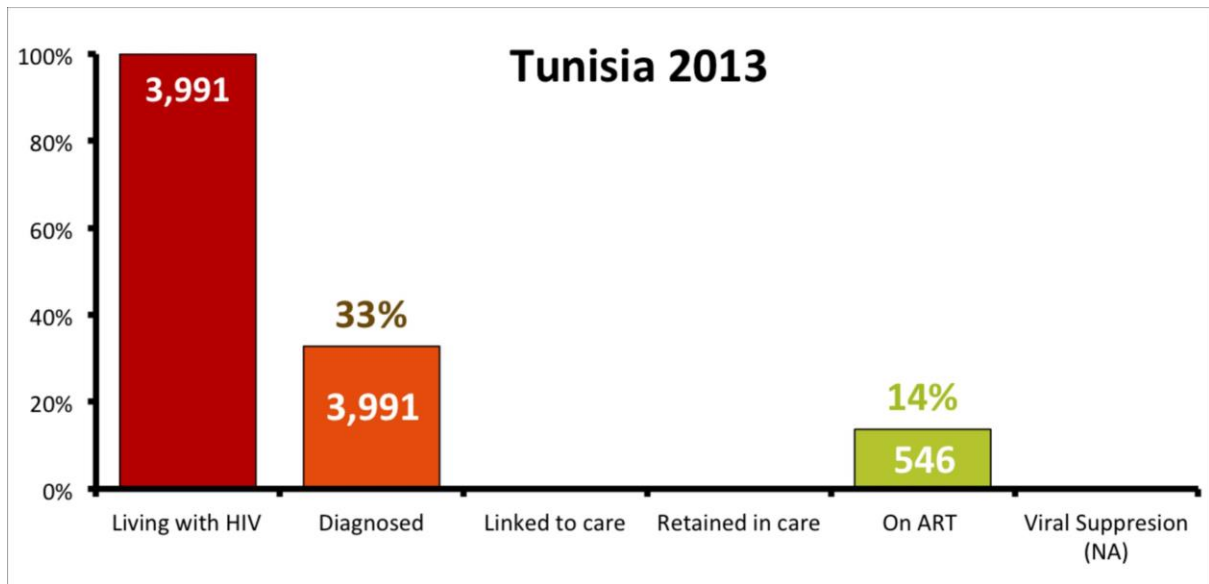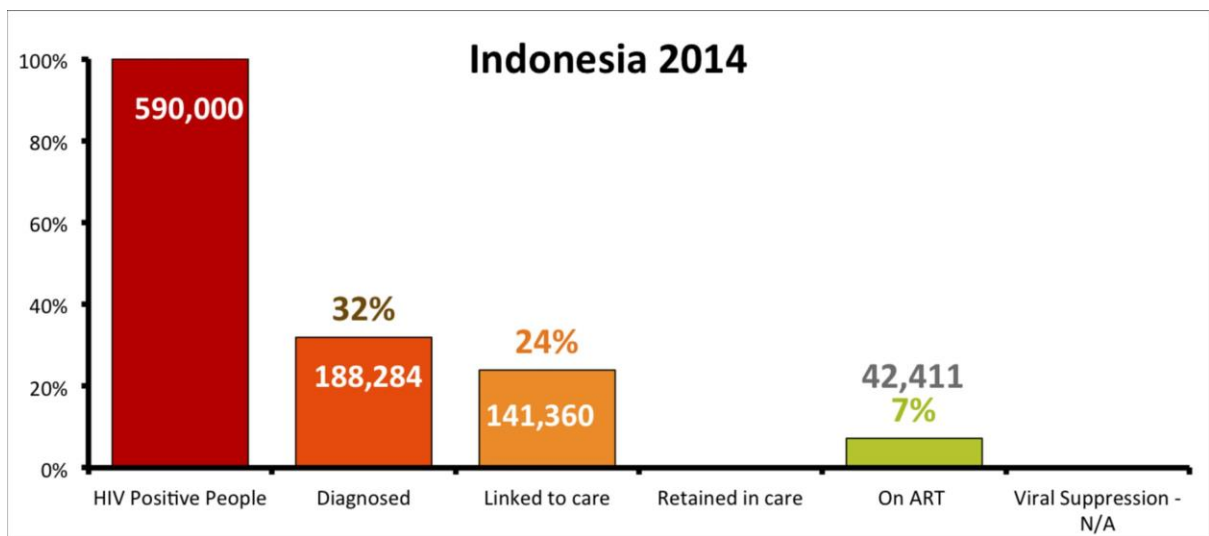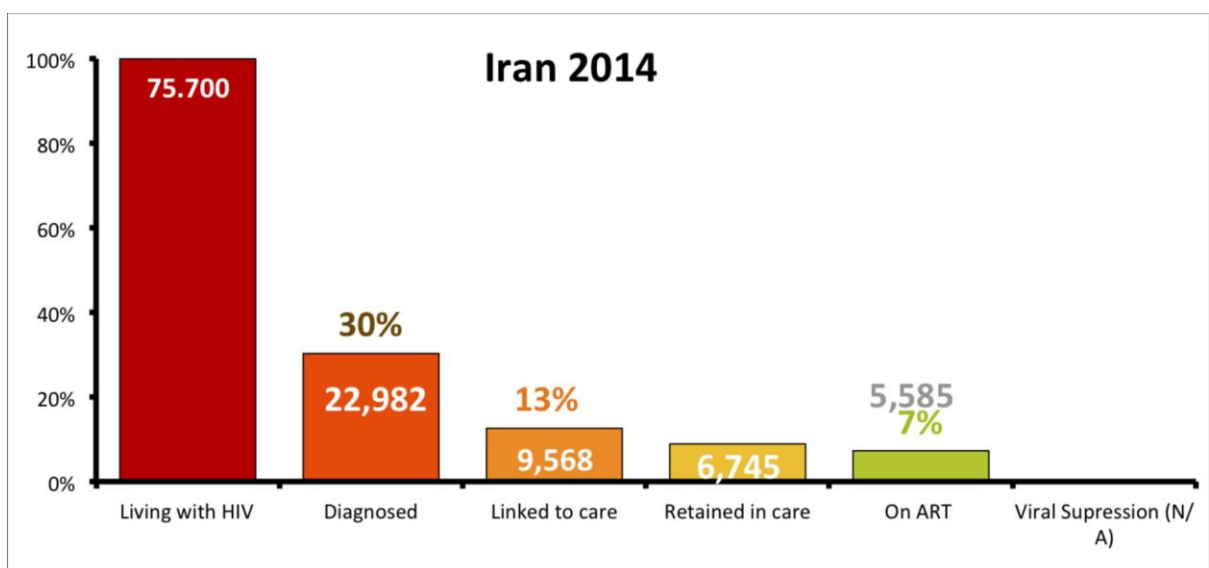

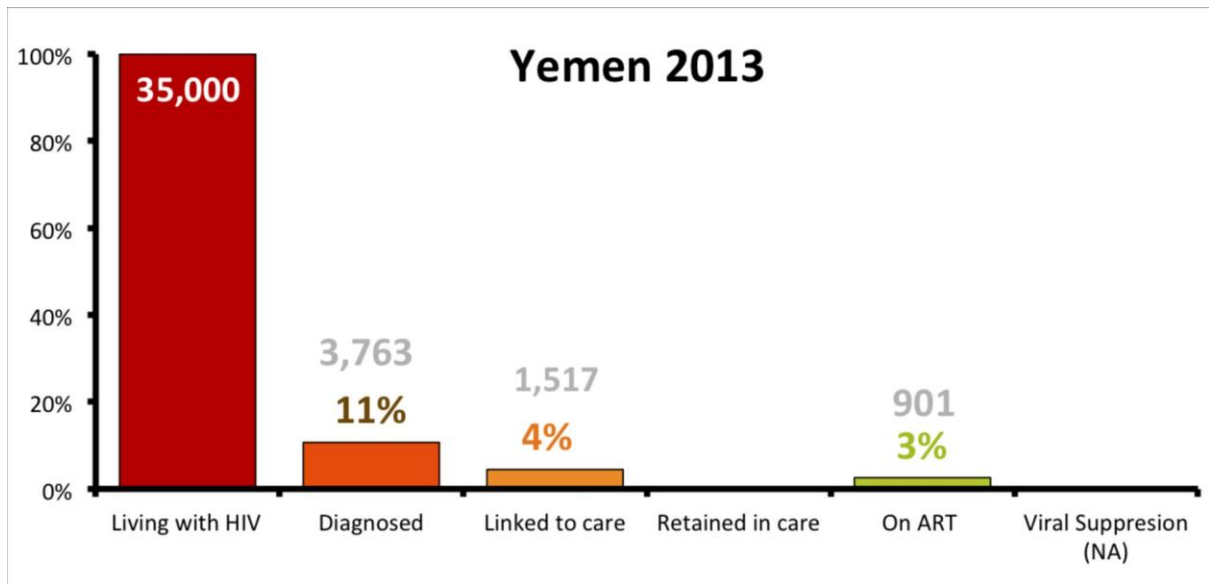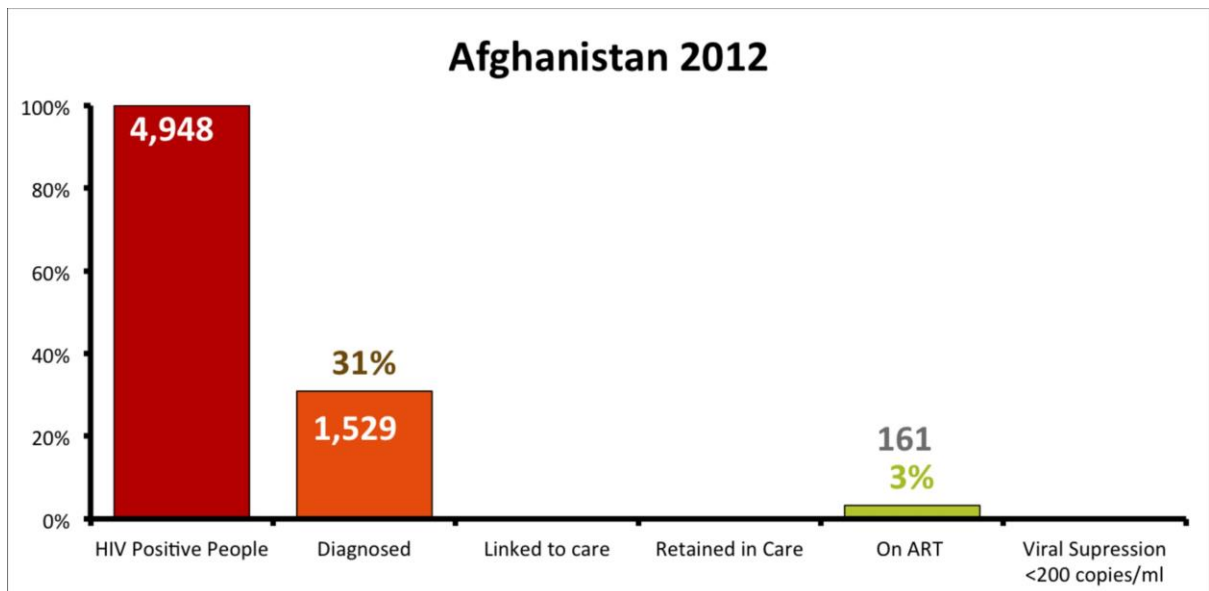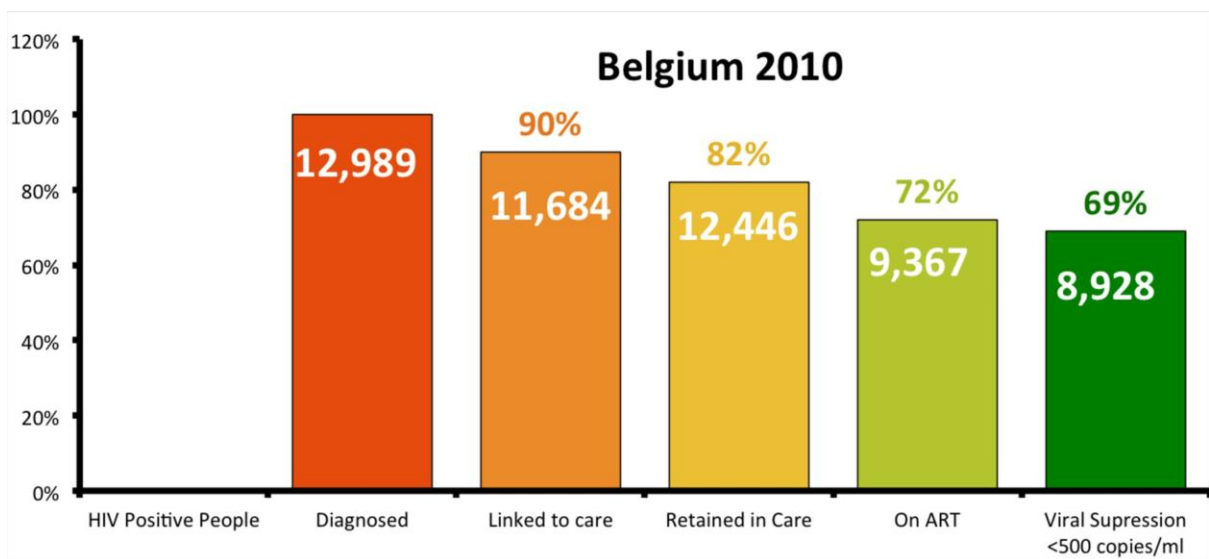

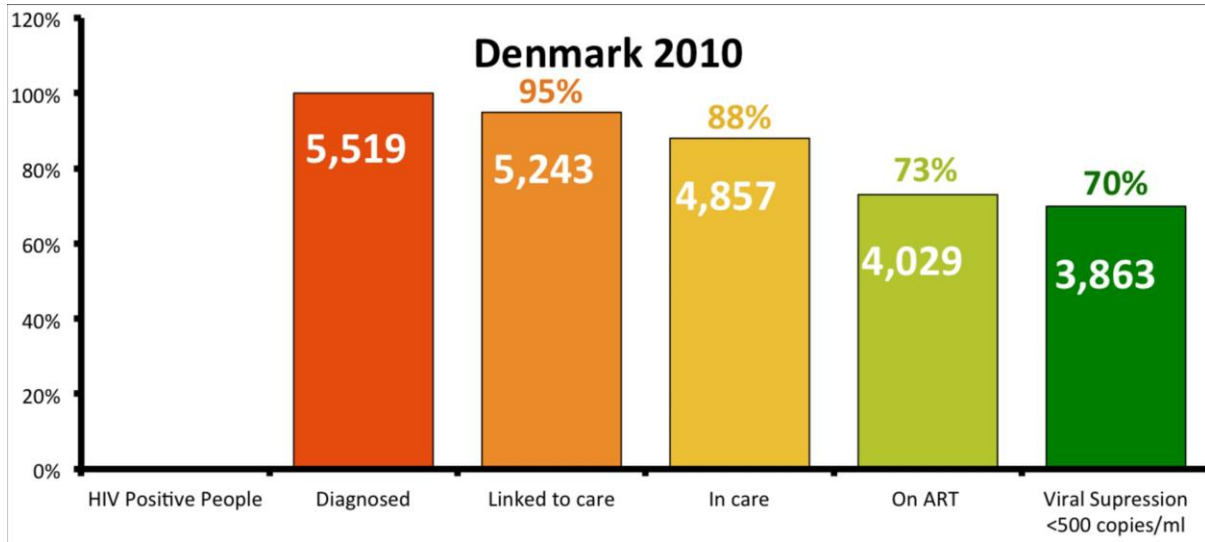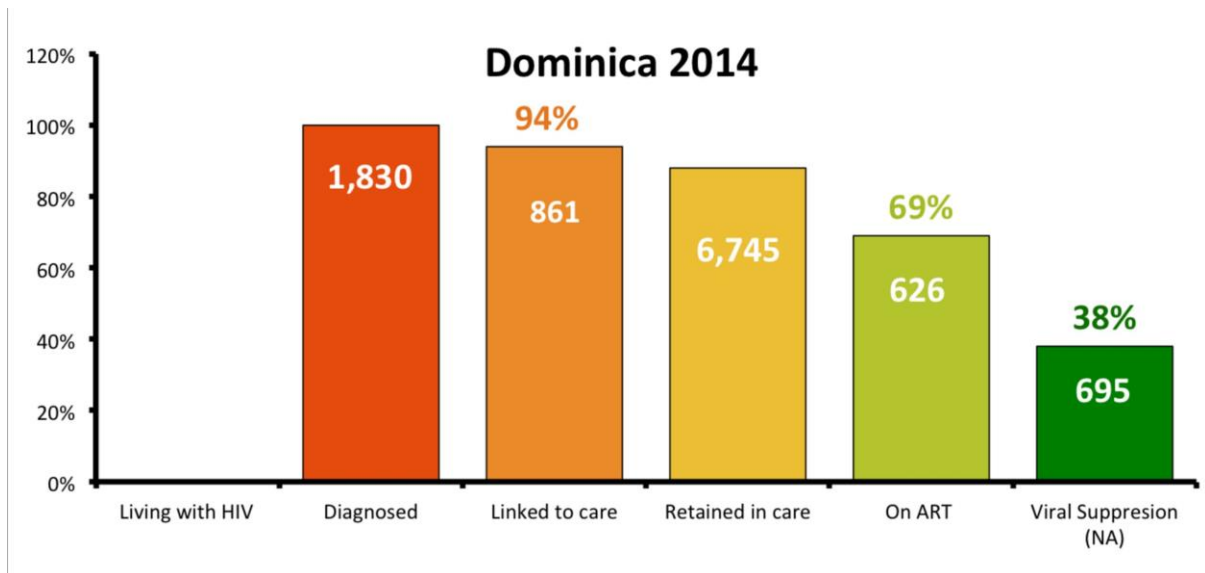

Supplement: bmjgh-2015-000010supp_figure2.pdf [file bmjgh-2015-000010supp_figure2.pdf]
